# Supplementary material for: USP25 promotes pathological HIF-1-driven metabolic reprogramming and is a potential therapeutic target in pancreatic cancer
Source: PubMed Central journal article supplement (PMC9018856; doi:10.1038/s41467-022-29684-9), 2022-04-19

1 **SUPPLEMENTARY INFORMATION**

2

3 **USP25 promotes pathological HIF-1-driven metabolic reprogramming and is a**  
4 **potential therapeutic target in pancreatic cancer**

5

6

7 Jessica K. Nelson, May Zaw Thin, Theodore Evan, Steven Howell, Mary Wu, Bruna  
8 Almeida, Nathalie Legrave, Duco S. Koenis, Gabriela Koifman, Yoichiro Sugimoto,  
9 Miriam Llorian Sopena, James MacRae, Emma Nye, Michael Howell, Ambrosius P.  
10 Snijders, Andreas Prachalias, Yoh Zen, Debashis Sarker, and Axel Behrens

11

12

13 **Supplementary Figure 1 (related to Figure 1). Characterization of enzymatically**  
14 **active DUBs in PDAC using activity-based proteomics.** (a) In-gel visualization of  
15 Cy5-Ub-ABP labelled DUBs in KPCY-organoids. (b) Mass spectrometry analysis of  
16 DUBs labelled with Biotin-ubiquitin-ABP in KPCY organoids. Volcano blot depicts the  
17 label-free quantification (LFQ) of  $-\log_{10}$  t-test p-value vs ratio difference of untreated  
18 (right side) and DUBi-treated (left side) samples. (c) Volcano plot shows the  
19 significance of each gene set from the Gene Ontology (GO) biological Process 2021  
20 dataset versus its odds ratio from mass spectrometry data in Figure 1c. Each point  
21 represents a single geneset; the x-axis measures the odds ratio (0, inf) calculated for  
22 the gene set, while the y-axis gives the  $-\log(p\text{-value})$  of the gene set. Larger blue points  
23 represent significant terms ( $p\text{-value} < 0.05$ ); smaller grey points represent non-  
24 significant terms. The darker the blue colour of a point, the more significant it is. (d)  
25 Bar chart shows the top 10 enriched terms in the GO Biological Process 2021 library,  
26 along with their corresponding p-values. (e) Mass spectrometry analysis of DUBs  
27 labelled with Biotin-ubiquitin-ABP in KPCY tumor tissue, with or without DUBi  
28 treatment (n=3 biologically independent samples per group). Displayed as median  
29 normalized  $-\log_{10}$  t-test p-value vs ratio difference of untreated (right side) and DUBi-  
30 treated (left side) samples. For (b and e) grey dots indicate all proteins identified, and  
31 red dots highlight all significant DUBs. Source data are provided as a Source Date file.

32

33 **Supplementary Figure 2 (related to Figure 2). Genetic knock-down screen**  
34 **identifies Usp25 as an essential DUB in PDAC organoids.** (a) Representative  
35 images of KPCY organoids following puromycin selection with non-targeting (NT) or  
36 YFP-targeting shRNAs. Scale bar is 800  $\mu\text{M}$ . (b) Quantification of YFP signal from (a),  
37 shown as mean fluorescent intensity (MFI), and displayed as mean  $\pm$  SD. Statistical

38 significance was determined by two-sided Student's t-test (n=6 biologically  
39 independent experiments). (c) Quantification of organoid growth calculated by % well  
40 confluency from live-cell phenotypic monitoring system, and displayed as mean  $\pm$  SD.  
41 Statistical significance was determined by two-sided Student's t-test (n=6 biologically  
42 independent experiments). (d) Organoid viability was measured after 72 hours post  
43 puromycin selection and shown as relative luminescent unit (RLU), and displayed as  
44 mean  $\pm$  SD. Statistical significance was determined by two-sided Student's t-test (n=6  
45 biologically independent experiments). (e) Representative images from live-cell  
46 phenotypic monitoring time-course in KPCY organoids. Confluency mask is shown in  
47 yellow. Scale bar is 1 mm. (f) Quantitative values are plotted from two representative  
48 control shRNA lines are shown, with a peak growth confluency between 72-90 hours,  
49 highlighted with red dashed bars in (f), and red box in (e). Black dashed lines highlight  
50 24- and 114-hour images in (e). Source data are provided as a Source Date file.

51

52 **Supplementary Figure 3 (related to Figure 3). USP25 is highly expressed and**  
53 **enzymatically active in PDAC compared to normal pancreatic tissue, which**  
54 **correlated with poor patient survival.** (a) Histological and immunohistochemical  
55 analysis of Usp25 expression in normal pancreatic and KPCY tumor tissues. Scale  
56 bar is 100  $\mu$ m. Each image comes for a biologically independent animal, quantified in  
57 Figure 3b (b) Histological and immunohistochemical analysis of USP25 staining in  
58 primary patient PDAC tumors. Scale bar is 1000  $\mu$ m and insert is 100  $\mu$ m. Each image  
59 comes from an independent patient.

60

61 **Supplementary Figure 4 (related to Figure 4). Depletion of *USP25* leads to**  
62 **reduced patient-derived organoid formation, viability and attenuated PDAC**

63 **tumor growth *in vivo*.** (a) Representative brightfield images of sh*Usp25* silencing in  
64 KPCY organoids. Scale bar is 800  $\mu\text{m}$ . (b) Expression of *Usp25* in KPCY organoids  
65 and displayed as relative mRNA expression compared to shYFP controls. Data shown  
66 as mean  $\pm$  SD, and statistical significance was determined by One-way ANOVA with  
67 Dunnett post-hoc test (n=4 biologically independent samples). (c) Expression of  
68 *USP25* in PDO lines and displayed as relative mRNA expression compared to shNT  
69 controls. Data shown as mean  $\pm$  SD, and statistical significance was determined by  
70 One-way ANOVA with Dunnett post-hoc test (n=4 biologically independent samples).  
71 (d) Representative images of sh*USP25* silencing in PDOs incubated with caspase-3  
72 activity probe. Scale bar is 800  $\mu\text{m}$ . (e) Schematic of *USP25* knock-out strategy using  
73 CRISPR/Cas9. (f) Sanger sequencing data of the *USP25* locus from PDO line (K17T)  
74 parental and *USP25* knock-out clones. (g) Representative images of the Hu-PDAC  
75 organoids, showing empty vector (EV) control and CRISPR/Cas9-mediated *USP25*  
76 knock-out cells. Each *USP25*<sup>-/-</sup> clones are described with single guide (sg) targeting  
77 exon shown. Scale bar is 400  $\mu\text{m}$ . (h) Organoid viability displayed as % relative to the  
78 EV, and shown as mean  $\pm$  SD. Statistical significance was determined by One-way  
79 ANOVA with Dunnett post-hoc test (n=3 biologically independent experiments).  
80 Source data are provided as a Source Date file.

81

82 **Supplementary Figure 5 (related to Figure 5). Transcriptional and metabolomic**  
83 **profiling of PDAC organoids reveals *USP25* as a novel regulator of HIF-1**  
84 **transcriptional activity and metabolic rewiring.** (a) Principal component analysis of  
85 log-transformed normalized counts for the top 5000 most variable transcripts (as  
86 determined by standard deviation) from the RNA-seq experiment. (b) Hierarchical  
87 clustering of log-transformed and mean-centered normalized counts for all

88 differentially expressed transcripts from the RNA-seq experiment. (c-d) Pathway  
89 analysis of differentially expressed genes down-regulated upon loss of *Usp25*. Bar  
90 chart shows the top 10 enriched terms in the (c) MsigDB Hallmark 2020 and (d) KEGG  
91 2021 libraries, along with their corresponding p-values. (e-f) Spearman correlation of  
92 *USP25* gene expression with gene signatures from (e) the KEGG glycolysis pathway  
93 or (f) the HALLMARK hypoxia pathway. Data in (e-f) generated from the GEPIA  
94 database, where each dot represents data from one patient expressed as transcripts  
95 per million (TPM).

96

97 **Supplementary Figure 6 (related to Figure 5). Transcriptional and metabolomic**  
98 **profiling of PDAC organoids reveals USP25 as a novel regulator of HIF-1**  
99 **transcriptional activity and metabolic rewiring.** (a) Heatmap of gene expression z-  
100 scores for the HALLMARK Hypoxia pathway (ID:M5891). (b) Gene expression in  
101 KPCY organoids, displayed as relative mRNA expression compared to shYFP  
102 controls. Data shown as mean  $\pm$  SD, and statistical significance was determined by  
103 two-sided Students t-test with Holm-Sidak post-hoc correction for multiple testing (n=4  
104 biologically independent experiments). (c) Glucose concentrations measured in  
105 culture medium from Mu KPCY organoids, and displayed as mean  $\pm$  SD. Statistical  
106 significance was determined by two-sided Students t-test with Holm-Sidak post-hoc  
107 correction for multiple testing (n=3 biologically independent experiments). (d-e)  
108 Incorporation of  $^{13}\text{C}$ -glucose into (d) intracellular pyruvate, and (e) TCA metabolites in  
109 treated KPCY organoids. Data in (d-e) is displayed as mean  $\pm$  SD, and represents one  
110 experiment carried out with six replicates. Due to technical limitations, statistics for (d-  
111 e) were performed on technical replicates using two-sided Student's t-test. Source  
112 data are provided as a Source Date file.

113

114 **Supplementary Figure 7 (related to Figure 6). USP25 interacts with,**  
115 **deubiquitylates and stabilizes HIF-1 $\alpha$  and promotes its transcriptional activity.**

116 (a) Western blot of indicated targets following siRNA-mediated knock-down of *USP25*  
117 or non-targeting (NT) control in human PDAC cell lines, treated with 200  $\mu$ M cobalt  
118 chloride ( $\text{CoCl}_2$ ) for six hours. (b) PDOs (line K13T) were treated with the cell-  
119 permeable Image-IT Red Hypoxia reagent to measure cellular hypoxia. Scale bar is  
120 100 $\mu$ m. (c) Organoid viability in indicated PDO lines measured at day 5 under high  
121 oxygen tension (20%) or low oxygen tension (1%) culture conditions. Values shown  
122 as relative luciferase unit (RLU), and displayed as mean  $\pm$  SD. Statistical significant  
123 was determined by two-way ANOVA with post hoc corrections for multiple testing (n=  
124 4 biologically independent experiments). (d) Western blot of indicated targets following  
125 shRNA-mediated knock-down of *USP25* or non-targeting control in PDOs (line K13T),  
126 with 200  $\mu$ M  $\text{CoCl}_2$  treatment for six hours where indicated. Source data are provided  
127 as a Source Date file.

128

129 **Supplementary Figure 8 (related to Figure 6). USP25 interacts with,**  
130 **deubiquitylates and stabilizes HIF-1 $\alpha$  and promotes its transcriptional activity.**

131 (a) HEK293T transfected with the indicated expression constructs for epitope-tagged  
132 *USP25* and HIF-1 $\alpha$ . GFP was co-transfected as a transfection efficiency and  
133 additional loading control. 24 hours post-transfection, cells were treated for an  
134 additional 24 hours with 200  $\mu$ M  $\text{CoCl}_2$ . Total cell lysates were immunoblotted or  
135 immunoprecipitated and analyzed as indicated. (b) Human renal carcinoma cell line  
136 RCC-4 was treated for 72 hours with siRNA for non-targeting (siNT) or four individual  
137 *USP25* targeting siRNA (*siUSP25* 1-4). Total cell lysates were immunoblotted as

138 indicated. (c) Western blot of indicated targets following siRNA-mediated knock-down  
139 of *USP25* or non-targeting control. (d) HEK293T cells transfected with indicated  
140 expression constructs for epitope-tagged HIF-1 $\alpha$  and USP25 and treated with 200  $\mu$ M  
141 cobalt chloride (CoCl<sub>2</sub>) for six hours. Sub-cellular fractionation was done to compare  
142 cytosolic and nuclear expression of indicated targets. (e) *SLC2A1* mRNA expression  
143 in HEK293T cells, displayed as relative mRNA expression compared to EV transfected  
144 control. Data shown as mean  $\pm$  SD, and statistical significance was determined by  
145 One-way ANOVA with Dunnett post-hoc test (n=4 biologically independent  
146 experiments). (f) Schematic of the lentiviral pInducer20-blast construct which was  
147 used to engineer PDO lines with DOX-inducible USP25 wild-type (WT) or catalytic  
148 mutant (C178S) expression. (g) Western blot images of endogenous protein levels  
149 following 48 hours of 1  $\mu$ M DOX treatment in PDOs (line K13T) with DOX-inducible  
150 USP25-WT or -C178S expression. (h) Gene expression in PDOs, displayed as relative  
151 mRNA expression compared to controls (grey bars). Each bar represents the mean  $\pm$   
152 SD, and each symbol represents a different shRNA targeting either *HIF1A* or YFP  
153 control from the average of three biologically independent PDO lines. Statistical  
154 significance was determined by two-sided Students t-test with Holm-Sidak post-hoc  
155 correction for multiple testing. (i) Western blot images of protein levels following 72  
156 hours of 500 nM DOX to induce expression of the HA-tagged HIF-1 $\alpha$  stabilization  
157 mutant (HIF1A<sup>P402A/P456A</sup>) in indicated PDO lines. Source data are provided as a  
158 Source Date file.

159

160 **Supplementary Figure 9 (related to Figure 7). Pharmacological inhibition of**  
161 **USP25 leads to loss of HIF-1 $\alpha$  signaling and reduced tumor growth *in vitro* and**  
162 ***in vivo*.** (a) Brightfield images of Mu wild-type (WT) and KPCY organoids treated with

163 100nM FT206. Scale bar is 500  $\mu$ m. (b) Total cell lysates were immunoblotted as  
164 indicated. (c) *Usp28* knock-out organoids treated with FT206 at the indicated doses  
165 for 72 hours. Organoid viability was displayed as % relative to vehicle-treated control,  
166 and shown as mean  $\pm$  SD. Statistical significance was determined by One-way  
167 ANOVA with Dunnett post-hoc test (n=3 biologically independent experiments). (d)  
168 Representative brightfield images from (Figure 7c) of PDO lines treated with vehicle  
169 or 100nM FT206. Scale bar is 0.5 mm. (e) Gene expression in KPCY organoids,  
170 displayed as relative mRNA expression compared to vehicle-treated controls. Data  
171 shown as mean  $\pm$  SD, and statistical significance was determined by two-sided  
172 Student's t-test with Holm-Sidak post-hoc correction for multiple testing (n=4  
173 biologically independent experiments). (f) Heatmap displaying organoid viability in  
174 KPCY organoids treated with FT206 or different tankyrase and Wnt signaling inhibitors  
175 at indicated concentrations, displayed as relative luciferase unit (RLU). (g) Heatmap  
176 displaying organoid viability of PDO lines treated AZ6102 with indicated  
177 concentrations, calculated as % of vehicle-treated. Source data are provided as a  
178 Source Date file.

179

180 **Supplementary Figure 10 (related to Figure 7). Pharmacological inhibition of**  
181 **USP25 leads to loss of HIF-1 $\alpha$  signaling and reduced tumor growth *in vitro* and**  
182 ***in vivo*.** (a) Subcutaneous tumor weights at endpoint from experiments derived with  
183 different KPCY organoid lines. Data displayed as mean  $\pm$  SD, and statistical  
184 significance was determined by two-sided Student's t-test (KPCY-1 is equal to n=6  
185 biologically individual animals per group, and KPCY-2 and -3 are equal to n=5  
186 biologically individual animals per group). (b) Body weights of animals treated with  
187 FT206 (75 mg/kg) or vehicle, three times a week for 5 weeks. Data plotted as mean  $\pm$



188 SD (n=5 biologically individual animals per group). (c) Growth curves of PDOX  
189 volumes (line K3T), treated with vehicle or FT206. Data plotted as mean  $\pm$  SD, and  
190 statistical significance was determined by Two-way ANOVA (n=5 biologically  
191 individual animals per group). (d) Representative images of 3D ultrasound images of  
192 PDOXs described in (c). Scale bar is 3mm (e) Endpoint tumor volumes (mm<sup>3</sup>) of  
193 PDOX, from lines K3T (n=5 biologically individual animals per group) and K10T (n=6  
194 biologically individual animals per group). Statistical significance was determined by  
195 two-sided Student's t-test. (f) Body weights of animals treated with FT206 (75 mg/kg)  
196 or vehicle, two-three times a week for 6 weeks. Data plotted as mean  $\pm$  SD (n=5  
197 biologically individual animals per group). (g) Representative immunohistochemical  
198 analysis of active cleaved caspase-3 (C3A) expression in subcutaneous KPCY  
199 organoid tumors. Scale bar is 1000  $\mu$ m. Quantification shown in Figure 7h. Source  
200 data are provided as a Source Date file.

201

202 **Supplementary Figure 11 (related to Figure 7). Pharmacological inhibition of**  
203 **USP25 leads to loss of HIF-1 $\alpha$  signaling and reduced tumor growth *in vitro* and**  
204 ***in vivo*.** (a) Representative images of immunofluorescent staining of DAPI (grey),  
205 CK19 (blue) and hypoxyprobe (red) in PDOX treated with vehicle or FT206. Scale bar  
206 is 1000  $\mu$ m, and insert is 100  $\mu$ m. (b) Quantification of hypoxyprobe positive staining  
207 area in whole tumor sections. Data displayed as mean  $\pm$  SD, and statistical  
208 significance was determined by two-sided Student's t-test (n=14 biologically  
209 independent animals for vehicle and n=10 biologically independent animals for FT206  
210 groups). (c) Representative images of immunofluorescent staining of Slc2a1 (red) and  
211 Lectin (blue) in KPCY subcutaneous tumors treated with vehicle or FT206. Scale bar  
212 is 1000  $\mu$ m, and insert b and d are 100  $\mu$ m. (d) Quantification of Slc2a1 positive

213 staining area, displayed as mean  $\pm$  SD. Statistical significance was determined by two-  
214 sided Student's t-test (n=8 biologically independent animals per group). (e)  
215 Quantification of Lectin positive staining area, displayed as mean  $\pm$  SD. Statistical  
216 significance was determined by two-sided Student's t-test (n=8 biologically  
217 independent animals per group). (f) Representative images of subcutaneous tumors  
218 of KPCY organoids treated with vehicle or FT206. (g) Immunohistochemical analysis  
219 of SLC2A1 staining in primary patient PDAC tumors. Scale bar is 50  $\mu$ m. (h)  
220 Correlation between protein expression of SLC2A1 (% positive area) versus USP25  
221 (% positive area) was assessed using linear regression. R-value and p-value are  
222 shown in graph inset. Source data are provided as a Source Data file.

223

224 **Supplementary Figure 12. Graphical summary.**

225 USP25 is highly expressed and active in PDAC, compared to normal pancreatic tissue.  
226 USP25 antagonizes polyubiquitination of HIF-1 $\alpha$ , leading to HIF-1 $\alpha$  stabilization and  
227 transcriptional activity. Enhanced HIF-1 $\alpha$  transcriptional activity promotes metabolic  
228 reprogramming and tumor cell survival in the hypoxic tumor microenvironment.

229

230

231 **Supplementary Table 1.** Patient-derived organoids used in this study with detailed  
 232 description of morphology, mutational status and primary tumour stage and histology.

233

| <b>PDO Line</b> | <b>PDO morphology</b> | <b>KRAS status</b> | <b>TP53 status</b> | <b>TNM Stage</b> | <b>Histology</b>          | <b>Neoadjuvant Chemo?</b> |
|-----------------|-----------------------|--------------------|--------------------|------------------|---------------------------|---------------------------|
| K3T             | non-cystic            | missense mutation  | missense mutation  | T2N1M0           | Poorly differentiated     | None                      |
| K4T             | cystic                | missense mutation  | missense mutation  | T2N2M0           | Moderately differentiated | None                      |
| K5T             | non-cystic            | missense mutation  | no mutation        | T3N2M0           | Moderately differentiated | None                      |
| K7T             | cystic                | missense mutation  | deep deletion      | T4N1M0           | Moderately differentiated | FOLFIRINOX<br>12 Cycles   |
| K10T            | non-cystic            | missense mutation  | missense mutation  | T2N1M0           | Moderately differentiated | None                      |
| K13T            | cystic                | missense mutation  | no mutation        | T2N1M0           | Moderately differentiated | None                      |
| K17T            | cystic                | missense mutation  | no mutation        | Unknown          | Moderately differentiated | None                      |
| K19T            | cystic                | missense mutation  | nonsense mutation  | Unknown          | Moderately differentiated | None                      |
| K22T            | non-cystic            | missense mutation  | missense mutation  | T2N1M0           | Moderately differentiated | None                      |
| K25T            | non-cystic            | missense mutation  | missense mutation  | T2N1M0           | Moderately differentiated | None                      |
| K28T            | cystic                | missense mutation  | missense mutation  | T2N1M0           | No diff. status           | None                      |
| K36T            | non-cystic            | n/a                | n/a                | T3N1M0           | Adenosquamous             | None                      |
| K38T            | cystic                | missense mutation  | n/a                | T2N1M0           | No diff. status           | None                      |
| K46T            | non-cystic            | missense mutation  | n/a                | T2N2M0           | Moderately differentiated | None                      |

234

235

**Supplementary Table 2.** shRNA target sequences.

| Gene name    | Species | Clone ID       | Sequence (5'-3')                                              |
|--------------|---------|----------------|---------------------------------------------------------------|
| YFP-1        | N/A     | N/A            | ccgggaacggcatcaaggtgaacttctcgagaagttcacc<br>ttgatgccgtcttttg  |
| YFP-2        | N/A     | N/A            | ccggcaacagccacaacgtctatatctcgagatagacg<br>ttgtggctgtgttttg    |
| YFP-3        | N/A     | N/A            | ccggggagcgcaccatcttctcaactcgagttgaagaag<br>atggcgcctccttttg   |
| Non-Target-1 | N/A     | SHC002         | ccggcaacaagatgaagagcaccaactcgagttggct<br>ctcatctgtgttttg      |
| Non-Target-2 | N/A     | SHC0016        | ccggcgcgatagcgctaataattctcgagaaattattagc<br>gctatcgcgcttttg   |
| Usp8-1       | Mu      | TRCN0000030744 | ccggcctcacatctaagtctacaactcgagttgaagcatt<br>agatgtgaggttttg   |
| Usp8-2       | Mu      | TRCN0000030745 | ccggcgcagtttacaaccaatgctactcgagtagcattggt<br>gtaaactcgttttg   |
| Usp8-3       | Mu      | TRCN0000030746 | ccggccaaaggattaacggcgagaactcgagttctgcc<br>gtaatccttgggttttg   |
| Usp14-1      | Mu      | TRCN0000030758 | ccgggagaagttgaaggtgtagaactcgagttctacacct<br>caaacttctcttttg   |
| Usp14-2      | Mu      | TRCN0000030757 | ccgggcagctcttagagattgttctcgagaaacaaatctct<br>aagagctccttttg   |
| Usp14-3      | Mu      | TRCN0000312005 | ccgggagaagttgaaggtgtagaactcgagttctacacct<br>caaacttctcttttg   |
| Uchl3-1      | Mu      | TRCN0000030714 | ccggcttgacagaaacaccaaactcagatttgggtgtt<br>ctgcaagatttttg      |
| Uchl3-2      | Mu      | TRCN0000030715 | ccggcctgaacttcttagcatggtactcgagtaccatgctaa<br>gaagttcaggttttg |
| Uchl3-3      | Mu      | TRCN0000030718 | ccgggcagtggtaccaagaccagtatctcgagatactggct<br>tggaccatgcttttg  |
| Usp19-1      | Mu      | TRCN0000030782 | ccggcgatccttgaagctgagattctcgagaatctcagct<br>caaaggatcgttttg   |
| Usp19-2      | Mu      | TRCN0000030780 | ccggcggcacaagatgagaaatgatctcgagatcatttctc<br>atctgtgccgttttg  |
| Usp19-3      | Mu      | TRCN0000335553 | ccggcggcacaagatgagaaatgatctcgagatcatttctc<br>atctgtgccgttttg  |
| Usp48-1      | Mu      | TRCN0000086675 | ccggccgaattgcttggtggcattctcgagaatgccaacc<br>aagcaattcgggttttg |
| Usp48-2      | Mu      | TRCN0000086673 | ccgggctgtcaacaattgctgaaactcgagttcagcaaat<br>tgtgacagcttttg    |
| Usp48-3      | Mu      | TRCN0000086677 | ccggctgaaggaagaacgattagaactcgagttctaatcgt<br>tcttctcagtttttg  |
| Usp7-1       | Mu      | TRCN0000087152 | ccgggccgaatttaacagagagaatctcgagattctctgt<br>taaattcggcttttg   |
| Usp7-2       | Mu      | TRCN0000087150 | ccggcctgcaatgtagataatgaactcgagttcattatctaa<br>cattcaggttttg   |
| Usp7-3       | Mu      | TRCN0000087151 | ccgggcaactatgaggtcatgtactcgagtacatgaacct<br>cataagttgcttttg   |
| Otud6b-1     | Mu      | TRCN0000113316 | ccgggccagagaattgaaattaaactcgagtttaattcca<br>attctctggcttttg   |
| Otud6b-2     | Mu      | TRCN0000113318 | ccggccagacatctgagagtgaactcgagttcactctc<br>aagatgctggttttg     |
| Otud6b-3     | Mu      | TRCN0000113319 | ccgggctgagtacatgcaaacctctcgagatgggtttgc<br>atgtactcagcttttg   |
| Usp28-1      | Mu      | TRCN0000030868 | ccgggctgttattcagttctcttctcagagaaagagagactg<br>aataacagcttttg  |

|          |    |                |                                                                |
|----------|----|----------------|----------------------------------------------------------------|
| Usp28-2  | Mu | TRCN0000030865 | ccggcggaagtgaaggaggaaataactcgagtatttccctc<br>tcaactccgcttttg   |
| Usp28-3  | Mu | TRCN0000030866 | ccgggcagtacattcaggaagataactcgagttatcttctg<br>aatgtactgcttttg   |
| Usp15-1  | Mu | TRCN0000231399 | ccggtgagagggtaaatagctaaatctcgagattagctatt<br>tcacctctcattttg   |
| Usp15-2  | Mu | TRCN0000231397 | ccggcagactgtggaacaagtatatctcgagatatacttgtt<br>ccacagctgcttttg  |
| Usp15-3  | Mu | TRCN0000033215 | ccgggctgacacaatagatacgattctcgagaatcgatct<br>attgtgcagcttttg    |
| Uchl5-1  | Mu | TRCN0000030724 | ccgggcaatcaagatgactggtactctcgagtaatccagtc<br>atcttgattgcttttg  |
| Uchl5-2  | Mu | TRCN0000030726 | ccgggtacgcatcaagatgtgattctcgagaatgcacatc<br>ttgatgctgacttttg   |
| Uchl5-3  | Mu | TRCN0000030725 | ccggctgccttccattatggaattctcgagaattccataatga<br>aaggcaagttttg   |
| Otud7b-1 | Mu | TRCN0000311256 | ccggggtagatattagggttgaatactcgagtattcaacct<br>aatactaccttttg    |
| Otud7b-2 | Mu | TRCN0000308627 | ccgggcagaaggaatggaatgaattctcgagaattcattcc<br>attccttctgcttttg  |
| Otud7b-3 | Mu | TRCN0000308626 | ccggccttttagtgaggaggacttctcgagaagtactccct<br>ccactaaaggcttttg  |
| Otub1-1  | Mu | TRCN0000030982 | ccgggagcaagttctcgagcacttctcgagaagtgtctga<br>agaactgtcttttg     |
| Otub1-2  | Mu | TRCN0000030983 | ccgggtccatccaagtggagtacatctcgagatgtactcca<br>cttgatggacttttg   |
| Otub1-3  | Mu | TRCN0000335250 | ccgggagcaagttctcgagcacttctcgagaagtgtctga<br>agaactgtcttttg     |
| Usp5-1   | Mu | TRCN0000030738 | ccggcgaggatgtgaagattgtcatctcgagatgacaatctt<br>cacatctcgcttttg  |
| Usp5-2   | Mu | TRCN0000030737 | ccggcctgggtacatctacttctactcgagtagaagtagat<br>gtagcccaggcttttg  |
| Usp5-3   | Mu | TRCN0000030736 | ccggcgaatgtcaaggccctcattctcgagaatgagggc<br>cttgaacattcgcttttg  |
| Usp24-1  | Mu | TRCN0000040628 | ccgggctggattcttaggcagaaactcgagtttctgcctaa<br>agaatccagcttttg   |
| Usp24-2  | Mu | TRCN0000086746 | ccggcccagctctgtctgccattctcgagaatggcagac<br>aagagctcgggcttttg   |
| Usp24-3  | Mu | TRCN0000086745 | ccggctattgtctatcccgtacaactcgagttgtacgggat<br>agaccaatgattttg   |
| Usp9x-1  | Mu | TRCN0000030759 | ccggcggctaaacttcttaggttctcgagaaacctaaagaa<br>agttaagccgcttttg  |
| Usp9x-2  | Mu | TRCN0000030763 | ccggcctcaacaagttggcacttctcgagaaagtgccaa<br>actgttgaggcttttg    |
| Usp9x-2  | Mu | TRCN0000030761 | ccgggcagaagaaatcactatgattctcgagaatcatagtg<br>atttcttctgcttttg  |
| Atxn3-1  | Mu | TRCN0000123962 | ccgggctcagaattgatcctataaactcgagttataggatc<br>aattctgagcttttg   |
| Atxn3-2  | Mu | TRCN0000123963 | ccggctgcactattctggctcaactcgagttgagccaaga<br>atagtgcgagcttttg   |
| Atxn3-3  | Mu | TRCN0000123961 | ccgggctcactttgtgctcagattctcgagaatgctgagca<br>caaagtgagcttttg   |
| Otud4-1  | Mu | TRCN0000252253 | ccggccgtgtcacaagcgcatttaactcgagttaaatgcmc<br>ttgtgacacggcttttg |
| Otud4-2  | Mu | TRCN0000252254 | ccgggctgtatagaagggtcatttctcgagaatgaccctt<br>ctataaacgcttttg    |
| Otud4-3  | Mu | TRCN0000252251 | ccggcacgttagattggatcataatctcgagattatgatcca<br>atctaacgtgcttttg |

|         |    |                |                                                              |
|---------|----|----------------|--------------------------------------------------------------|
| Usp25-1 | Mu | TRCN0000030827 | ccggcccaacgatcactgcaagaaactcgagttcttcgag<br>tgatcgttgggttttg |
| Usp25-2 | Mu | TRCN0000233427 | ccggttatactggacaggtatatgctcgagcatatacctgc<br>cagatataattttg  |
| Usp25-3 | Mu | TRCN0000233428 | ccggcatcgctggaggacggaaatactcgagtattccgct<br>ctccagcgatgttttg |
| Usp25-4 | Mu | TRCN0000233431 | ccggtagtataatggaacatattgctcgagcaatagggtc<br>cattatactattttg  |
| USP25-1 | Hu | TRCN0000004366 | ccgggcacttctcctgttgacgatactcgagtatcgtaaca<br>ggagaagtgcctttt |
| USP25-2 | Hu | TRCN0000004368 | ccgggctgtcctcatctgtgcttactcgagtaagcacagat<br>gaggaacagctttt  |
| USP25-3 | Hu | TRCN0000004369 | ccgggctgagctgaggtatctattctcgagaatagatacct<br>cagctcacgctttt  |
| USP25-4 | Hu | TRCN0000004370 | ccggtggaggagtaagatgaaatatctcgagatattcatct<br>tactcctccatttt  |
| HIF1A-1 | Hu | TRCN0000003808 | ccggccgctggagacacaatcatatctcgagatagattgt<br>gtctccagcggtttt  |
| HIF1A-2 | Hu | TRCN0000003811 | ccggcggcgaagtaagaatctgaactcgagttcagattct<br>ttactcgcgctttt   |
| HIF1A-3 | Hu | TRCN0000010819 | ccggtgctctttgtggttgatctactcgagtagatccaacca<br>caaagagcattttt |

238  
239  
240

241  
242

**Supplementary Table 3. RT-qPCR primers.**

| Target   | Species | FWD sequence (5'-3')    | REV sequence (5'-3')       |
|----------|---------|-------------------------|----------------------------|
| 36b4     | Mu/hu   | gtgctgatgggcaagaac      | aggctctccttggaac           |
| Tbp      | Mu      | cggtcgcgtcattttctc      | gggttatcttcacacacca        |
| Tbp      | Hu      | ccactcacagactctcacaac   | ctgcggtacaatcccagaact      |
| Atxn3    | Mu      | ggagacgagaagcctacttga   | tggatatgaaaggggtccag       |
| Otub1    | Mu      | gggtagcgactccgaagg      | gattctgcacagcaatctctg      |
| Otud4    | Mu      | gatgccctcacagatcacia    | tggggagaggccaaaatagt       |
| Otud6b   | Mu      | agaaggcatcggaaggaga     | agcgttcttcattccctgaa       |
| Otud7b   | Mu      | cggggttctgctcaaaag      | tcatgggatcatcagggtactctc   |
| Uchl3    | Mu      | agcagtcattggagggtcaa    | agcagtcattggagggtcaa       |
| Uchl5    | Mu      | gccaggagaagaacctgct     | cctgagtggcacaagcatta       |
| Usp5     | Mu      | ttcaccttggcttagactgg    | gagctcctctggcatctcaa       |
| Usp7     | Mu      | cccaggacatggagatg       | cattgatgacagggttctgagta    |
| Usp8     | Mu      | caaaaagagacctgattcaagc  | tgatgtttcagaggtccaagt      |
| Usp9x    | Mu      | tagtccgaggatctgccagt    | aaaccgcacgttcttgct         |
| Usp14    | Mu      | ggcgaacaagggcagatc      | tctgttcaggactctcatca       |
| Usp15    | Mu      | gctgttccaaccactatggag   | ccacttccatcatcttggtt       |
| Usp19    | Mu      | ggaaccggaatcgagagc      | cttcagcaaagaaccaagagc      |
| Usp24    | Mu      | cgagtctaccaagataccttact | gacgctgcctatcgtctcat       |
| Usp25    | Mu      | cagtcggctggaagaatgtcg   | aactccaaaagattgaataatgactg |
| Usp28    | Mu      | ctgcttctcggatcgtt       | cactggaggcagctttgtaa       |
| Usp48    | Mu      | agactcgaactctgtcaacctt  | gctgggcatatgagagcta        |
| USP25    | Hu      | tcagagactctgtgacaacagc  | tacttcttgatggctgctcta      |
| HIF1A    | Hu      | tttcaagcagtaggaattggaa  | gtgatgtagtagctgcatgatcg    |
| HIF1B    | Hu      | ctgtcatcctgaagaccagcag  | ctggttctcatccagagccattc    |
| HIF2     | Hu      | ctgtgtctgagaagagtaacttc | ttgccataggctgaggactcct     |
| MYC      | Hu      | tctccttgacgtgcttag      | gtcgtagtcgaggctcatag       |
| ENO1     | Hu      | tccaacatctggagaataa     | atgccgatgaccaccttatc       |
| ENO3     | Hu      | ttgagaagaaggcctgcaa     | ccccagccattagactg          |
| HK1      | Hu      | tgaggttgactcattgttg     | ccaccatctccacgttctc        |
| LDHA     | Hu      | cgtcagcaagaggagaaag     | gccacgtaggtaagatatcc       |
| PFKL     | Hu      | acaccctgtaactgtgctg     | atgccatcttgctgctc          |
| PKM      | Hu      | cagccaaaggggactatcct    | caaataattgcaagtggtagatgg   |
| SERPINE1 | Hu      | aaggcacctctgagaacttca   | cccaggactaggcagggtg        |
| SLC2A1   | Hu      | ggtgtgccatactcatgacc    | gagataggacatccagggtagc     |
| Hif1a    | Mu      | catgatggctcccttttca     | gtcacctggttgctgcaata       |
| Eno1     | Mu      | gaggcgcttagtgctgct      | atagacatggcgaatttctgg      |
| Eno3     | Mu      | gagggggtgaactgacactg    | gagtcttccaccgaaga          |
| Hk1      | Mu      | gtggacgggacgctctac      | ttcactgtttggtgcatgatt      |
| Ldha     | Mu      | gctccccagaacaagattacag  | tcgcccttgagttgtcttc        |
| Pfkl     | Mu      | attgaccggcatggaaaag     | aagcccagcctctgaacc         |
| Pfkl     | Mu      | gagggacccatctgcat       | gtagctccagcaaggcaat        |
| Pkm      | Mu      | gcagcagctttgatagtctcag  | tcgagtcacggcaatgatag       |
| Serpine1 | Mu      | aggatcgaggtaaaccgagagc  | gctgggctgagatgacaaa        |
| Slc2a1   | Mu      | gacctgcacctcattgg       | gatgctcagataggacatccaag    |

243  
244  
245

246 **Supplementary Table 4.** Electroporation settings for induction of PDO lines using  
247 the NEPA21 super electroporator from Nepagene.  
248  
249

| <b>Parameter</b> | <b>Poring Pulse</b> | <b>Transfer Pulse</b> |
|------------------|---------------------|-----------------------|
| Voltage          | 175V                | 20V                   |
| Pulse Length     | 5.0ms               | 50ms                  |
| Pulse Interval   | 50.0ms              | 50ms                  |
| Number of Pulses | 2                   | 5                     |
| Decay Rate       | 10%                 | 40%                   |
| Polarity         | +                   | +/-                   |

250  
251



252  
253  
254

**Supplementary Table 5.** Antibodies used for immunohistochemistry, immunofluorescence, and western blotting.

| ANTIBODY                                 | Company, product #                                     | Dilution | Application |
|------------------------------------------|--------------------------------------------------------|----------|-------------|
| Rabbit anti USP25                        | Sigma-Aldrich;<br>HPA024142                            | 1:100x   | IHC         |
| Rabbit anti SLC2A1 (Glut1)               | Alpha Diagnostics, GT11-A                              | 1:100x   | IHC         |
| Rabbit anti Caspase 3                    | R&D Bio-Techne, AF825                                  | 1:100x   | IHC         |
| Rat anti CK19                            | Developmental Studies<br>Hybridoma Bank, TROMA-<br>III | 1:100x   | IHC         |
| Goat anti GFP                            | Abcam, ab6673                                          | 1:100    | IHC         |
| Rabbit anti SLC2A1 (Glut1)               | Alpha Diagnostics, GT11-A                              | 1:100x   | IF          |
| Rat anti CK19                            | Developmental Studies<br>Hybridoma Bank, TROMA-<br>III | 1:100x   | IF          |
| Mouse anti $\alpha$ SMA                  | Sigma-Aldrich, A5228                                   | 1:100x   | IF          |
| Donkey anti rat IgG Alexa<br>Fluor488    | Life Technology, A21208                                | 1:200x   | IF          |
| Donkey anti mouse IgG<br>Alexa Fluor546  | Life Technology, A10036                                | 1:200x   | IF          |
| Donkey anti rabbit IgG<br>Alexa Fluor647 | Life Technology, A31573                                | 1:200x   | IF          |
| Mouse anti $\beta$ -ACTIN                | Abcam, ab49900                                         | 1:10000x | WB          |
| Rabbit anti GAPDH                        | Abcam, ab9485                                          | 1:5000   | WB          |
| Goat anti GFP                            | Abcam, ab6673                                          | 1:2000   | WB          |
| Rabbit anti Histone 3B                   | Millipore, 06755                                       | 1:1000   | WB          |
| Rabbit anti HIF-1 $\alpha$               | Novus, NB100-449                                       | 1:1000x  | WB          |
| Mouse anti FLAG-HRP M2                   | Sigma-Aldrich, A8592                                   | 1:10000  | WB          |
| Rabbit anti HIF-2                        | Cell Signaling, 7096                                   | 1:1000   | WB          |
| Rabbit anti ARNT (HIF-1 $\beta$ )        | Cell Signaling, 5537                                   | 1:1000   | WB          |
| Rabbit anti HA                           | Sigma-Aldrich, H6908                                   | 1:1000   | WB          |
| Rabbit anti<br>SLC2A1(GLUT1)             | Alpha Diagnostics, GT11-A                              | 1:1000   | WB          |
| Rabbit anti c-Myc                        | Abcam, Y69 clone,<br>ab32072                           | 1:1000   | WB          |
| Rabbit anti USP25                        | Abcam, ab187156                                        | 1:2000   | WB          |
| Rabbit anti USP28                        | Sigma, HP006779                                        | 1:1000   | WB          |
| Mouse anti V5 (tag)                      | Invitrogen, R960-25                                    | 1:5000   | WB          |
| Rabbit anti VHL                          | Cell Signaling, 68547                                  | 1:1000   | WB          |

255  
256

# Supplementary Figure 1

**a**

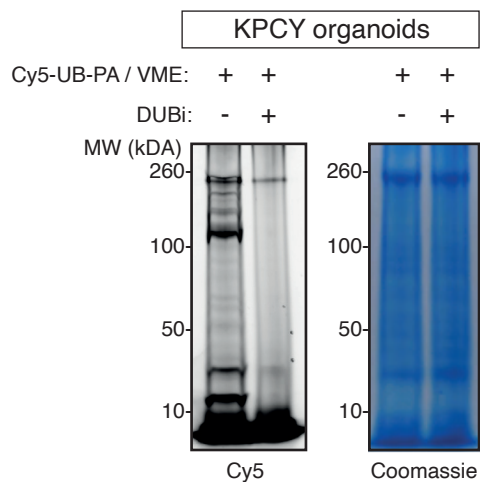

**b**

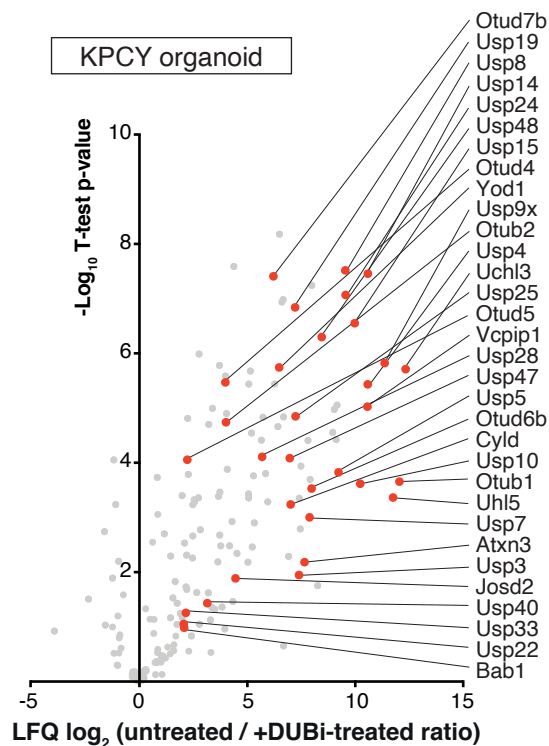

**c**

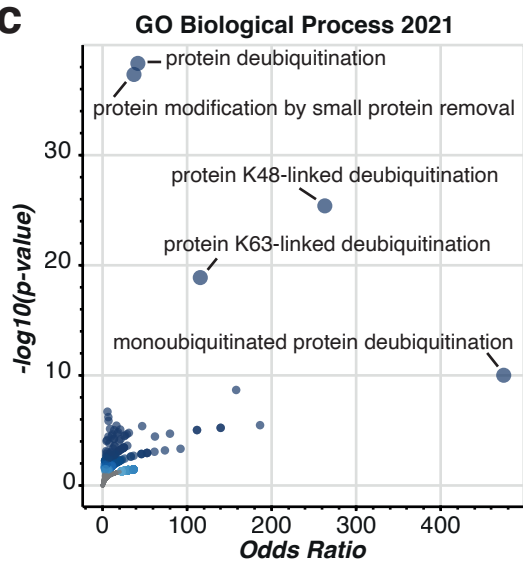

**d**

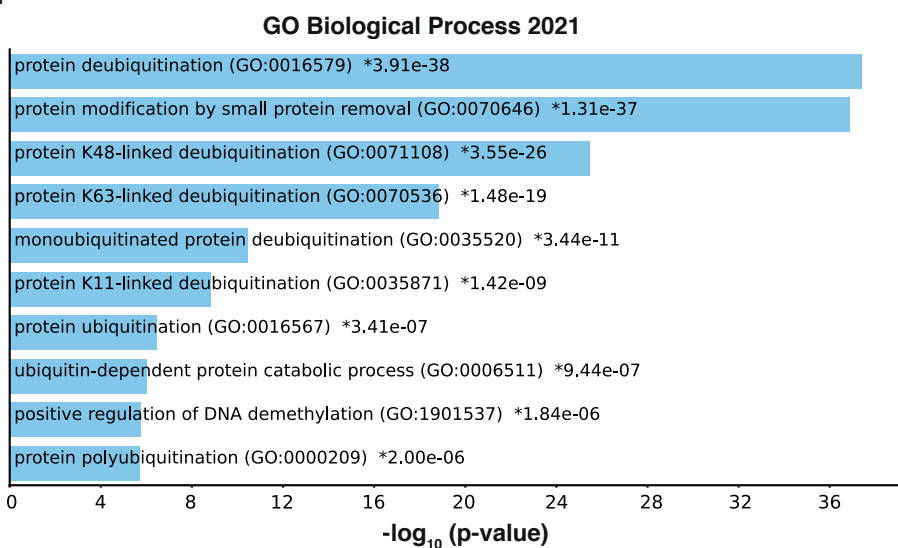

**e**

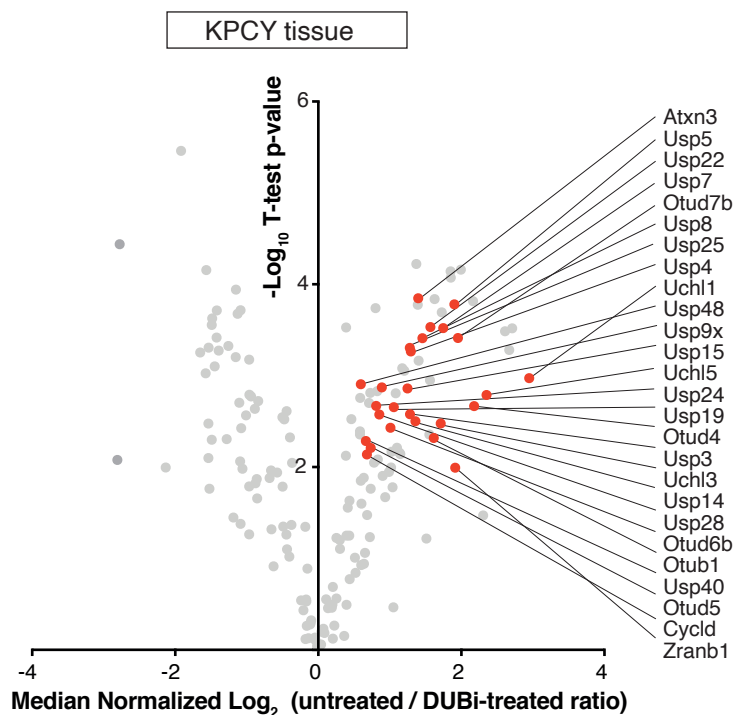

# Supplementary Figure 2

**a**

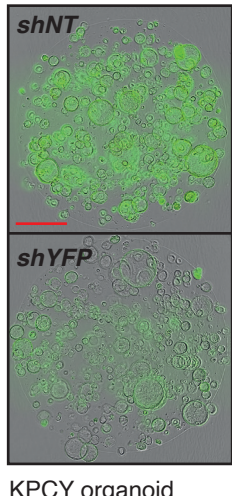

**b**

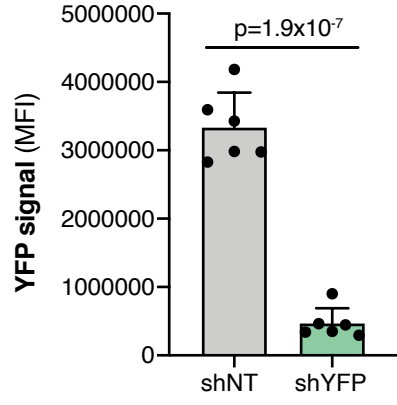

**c**

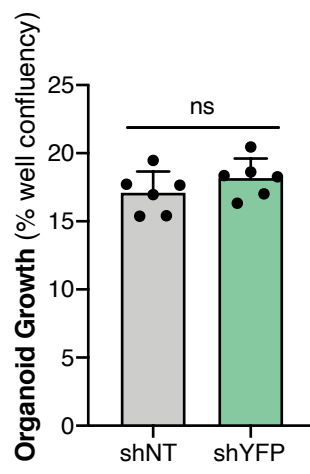

**d**

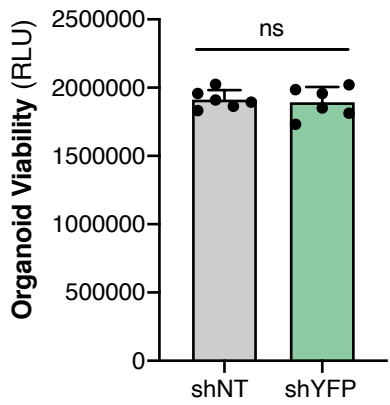

**e**

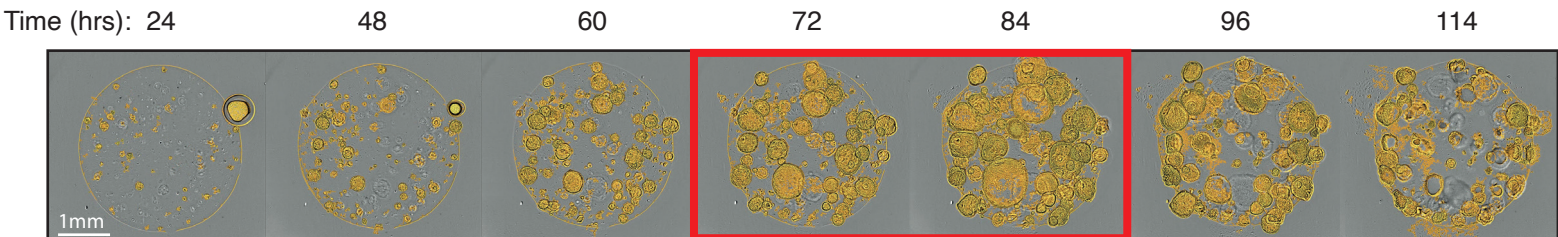

KPCY organoid shown with well confluency mask (in yellow)

**f**

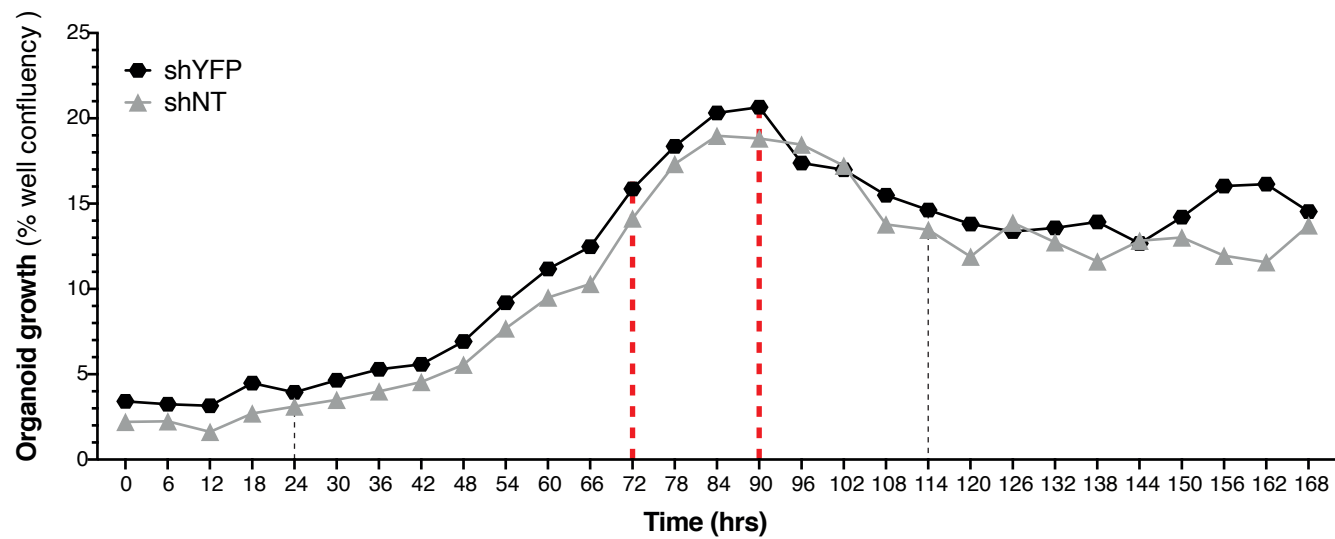

# Supplementary Figure 3

**a**

Usp25 staining in primary Mu tissues

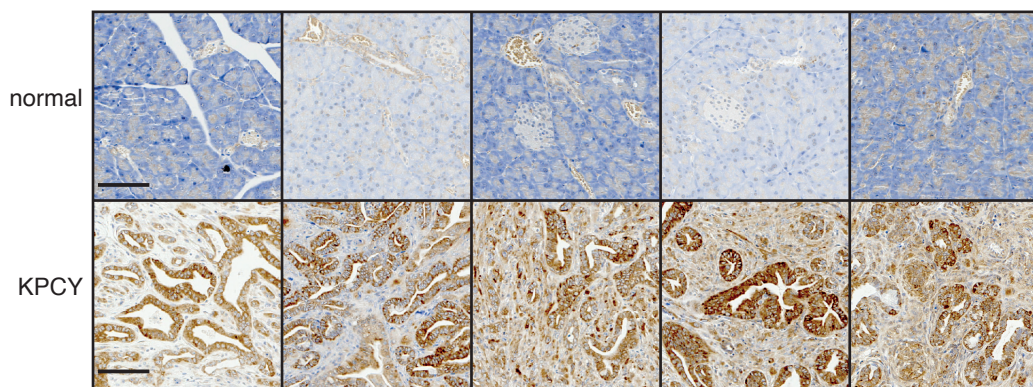

**b**

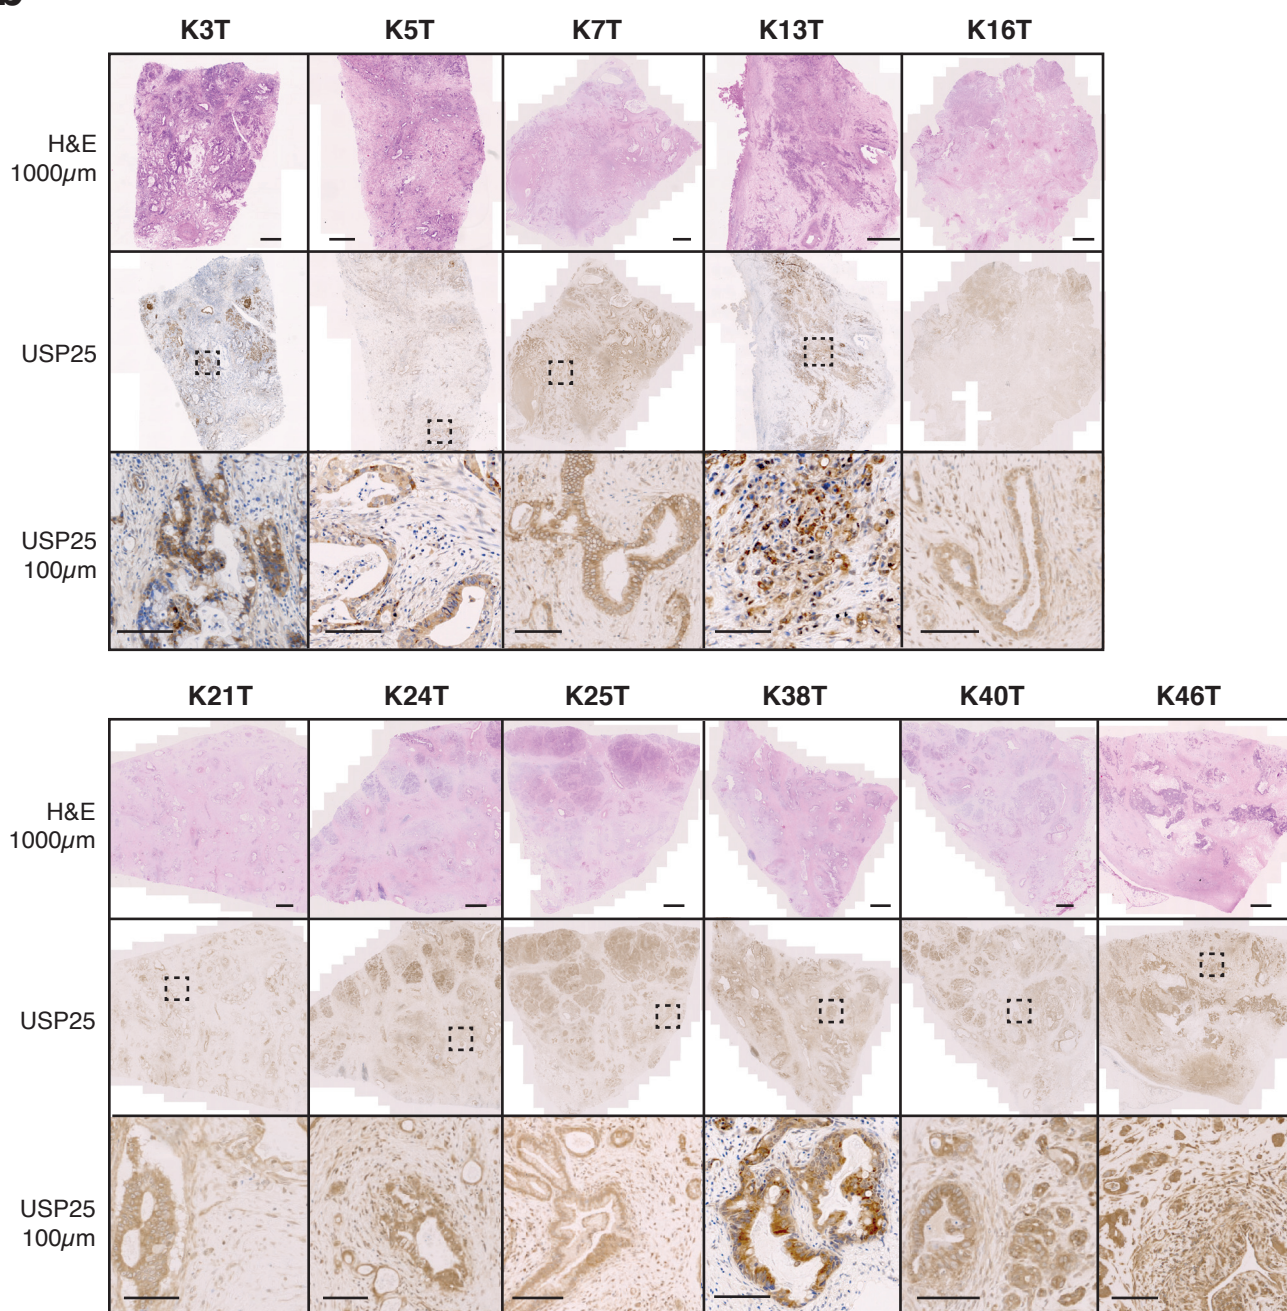

human PDAC tissue

# Supplementary Figure 4

**a**

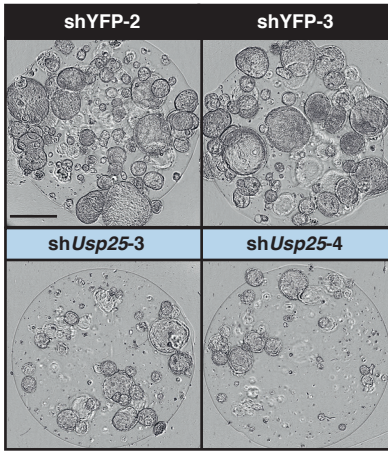

KPCY organoids

**b**

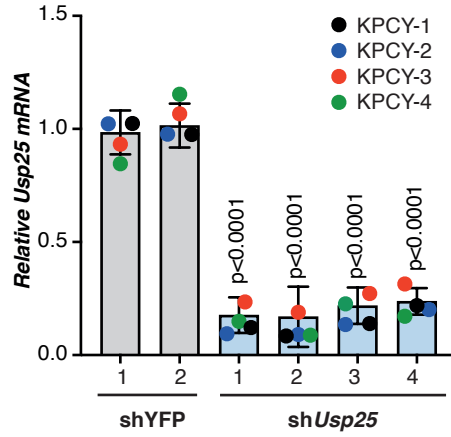

**c**

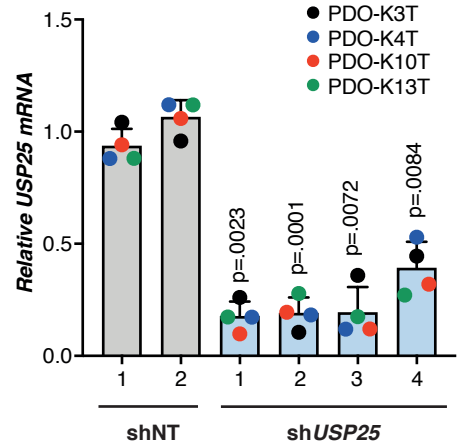

**d**

PDO (K4T)

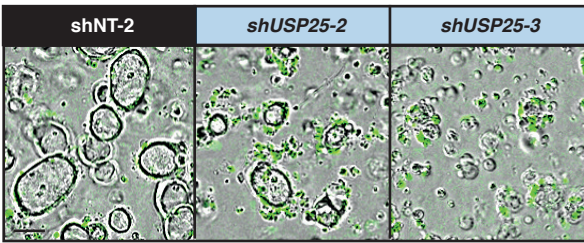

Caspase-3 activity probe

**e**

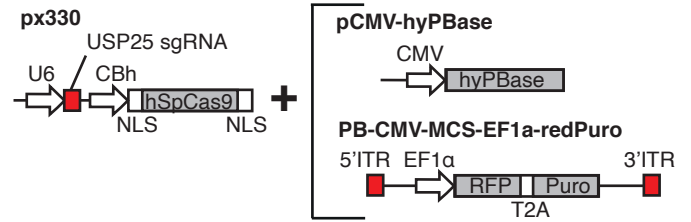

**f**

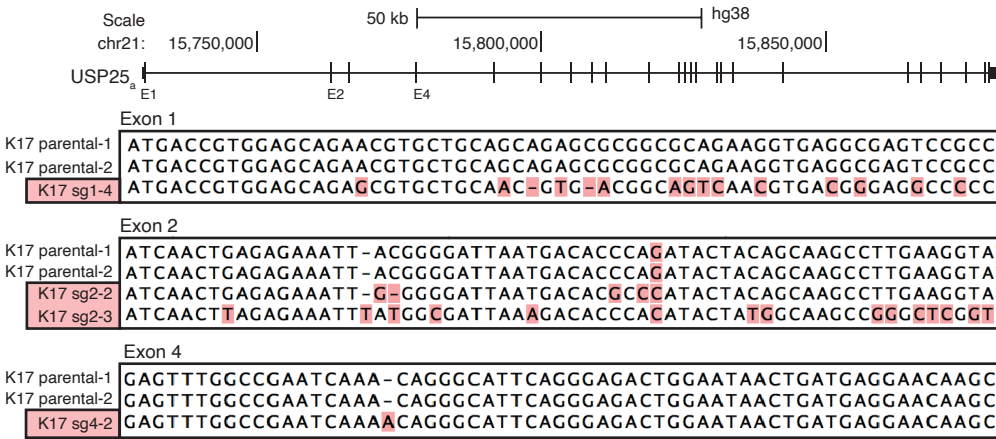

**g**

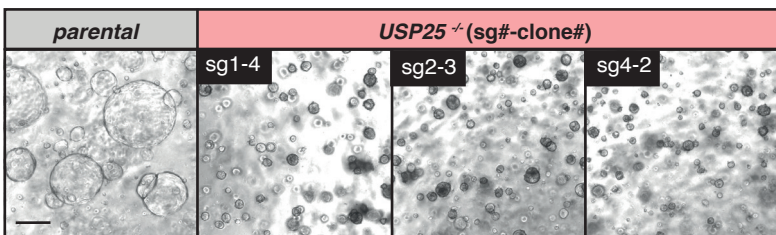

PDO (K17T)

**h**

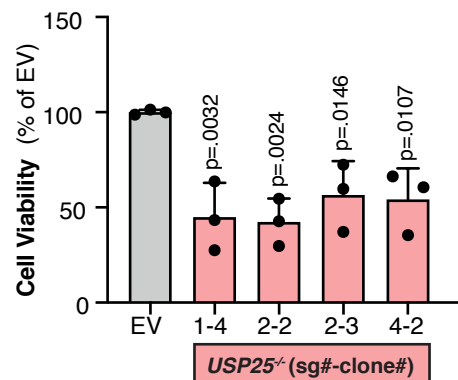

# Supplementary Figure 5

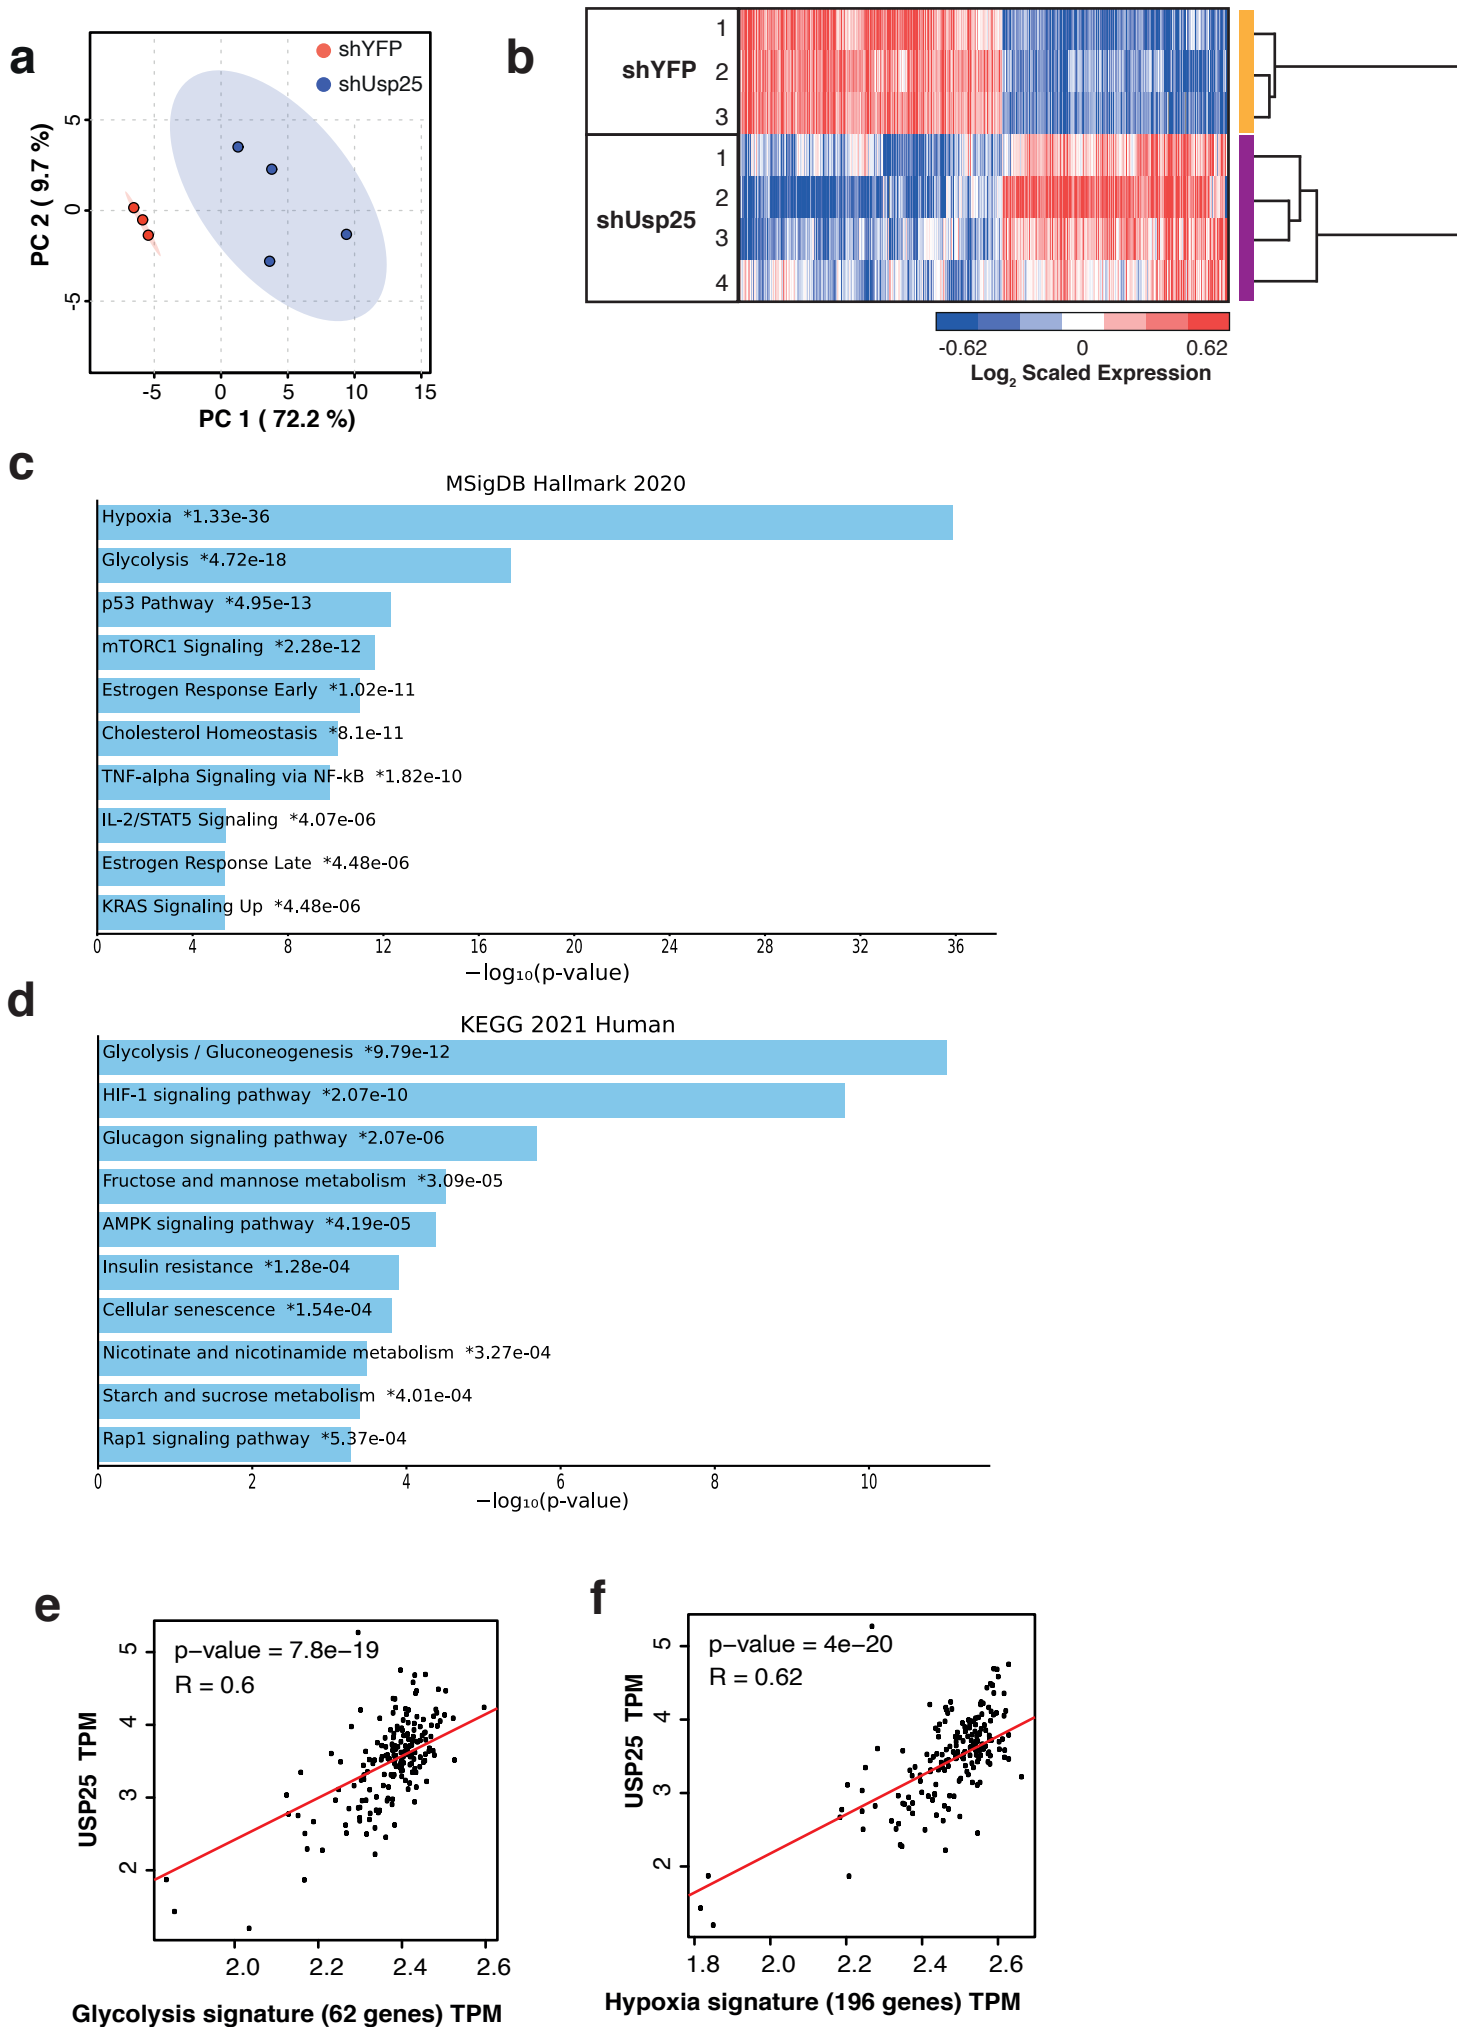

# Supplementary Figure 6

**a** Hypoxia signature (Hallmark)

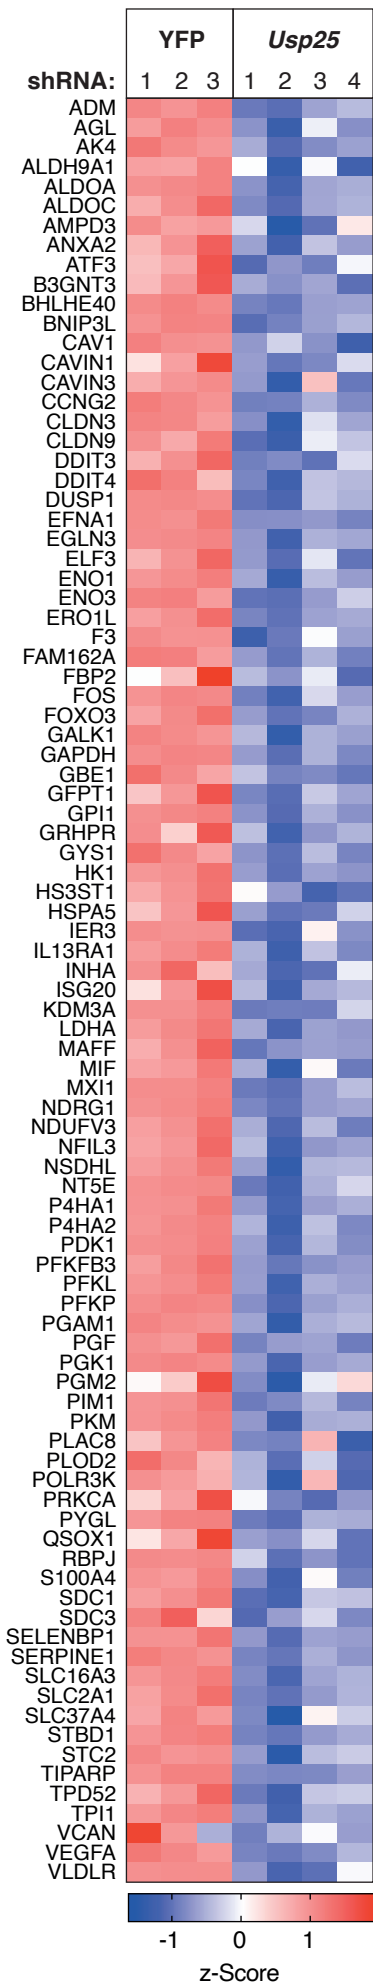

**b**

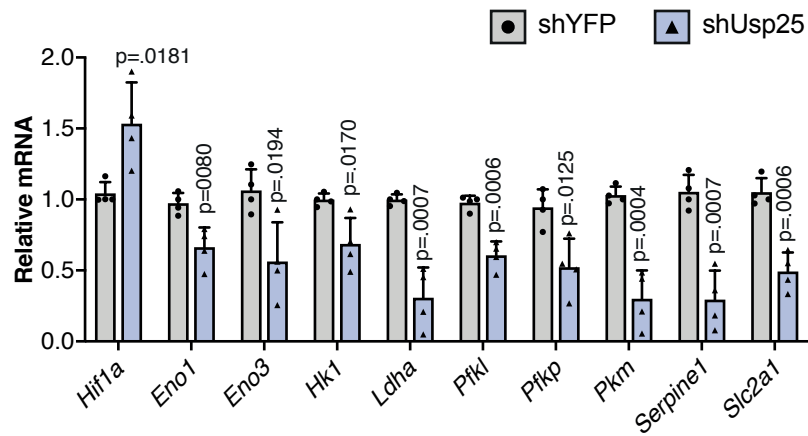

**c**

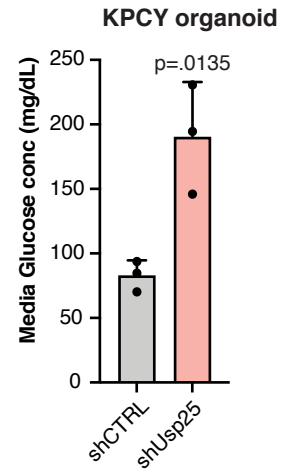

**d**

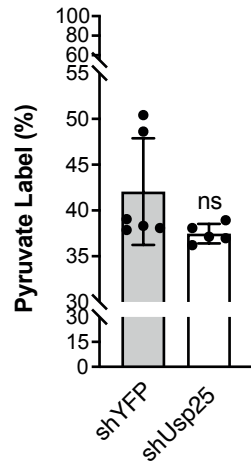

**e**

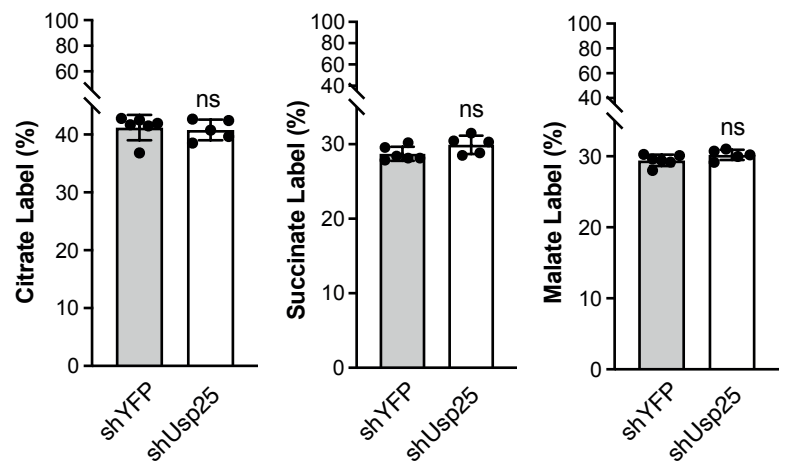

# Supplementary Figure 7

**a**

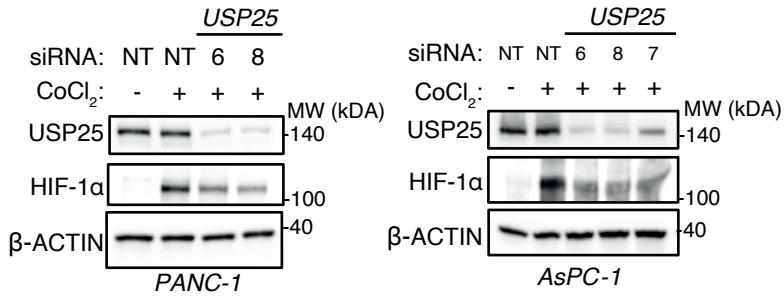

**b**

Image-IT Red Hypoxia Reagent :

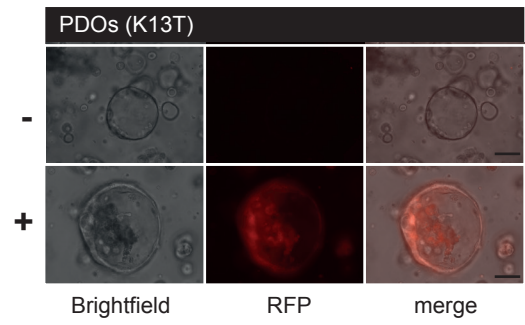

**c**

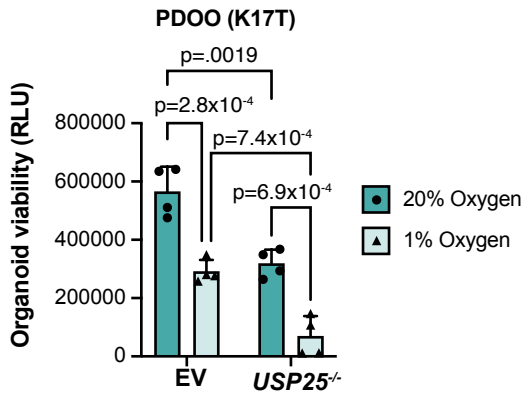

**d**

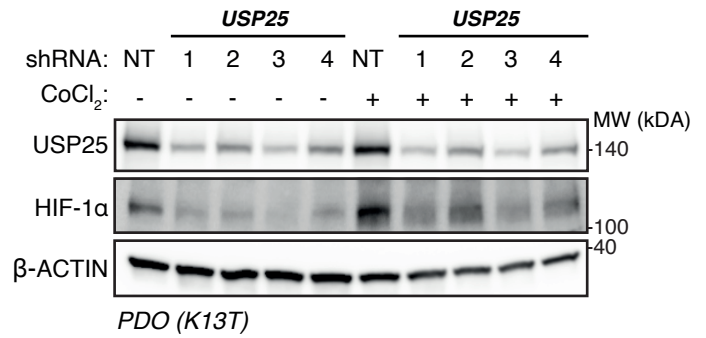



# Supplementary Figure 8

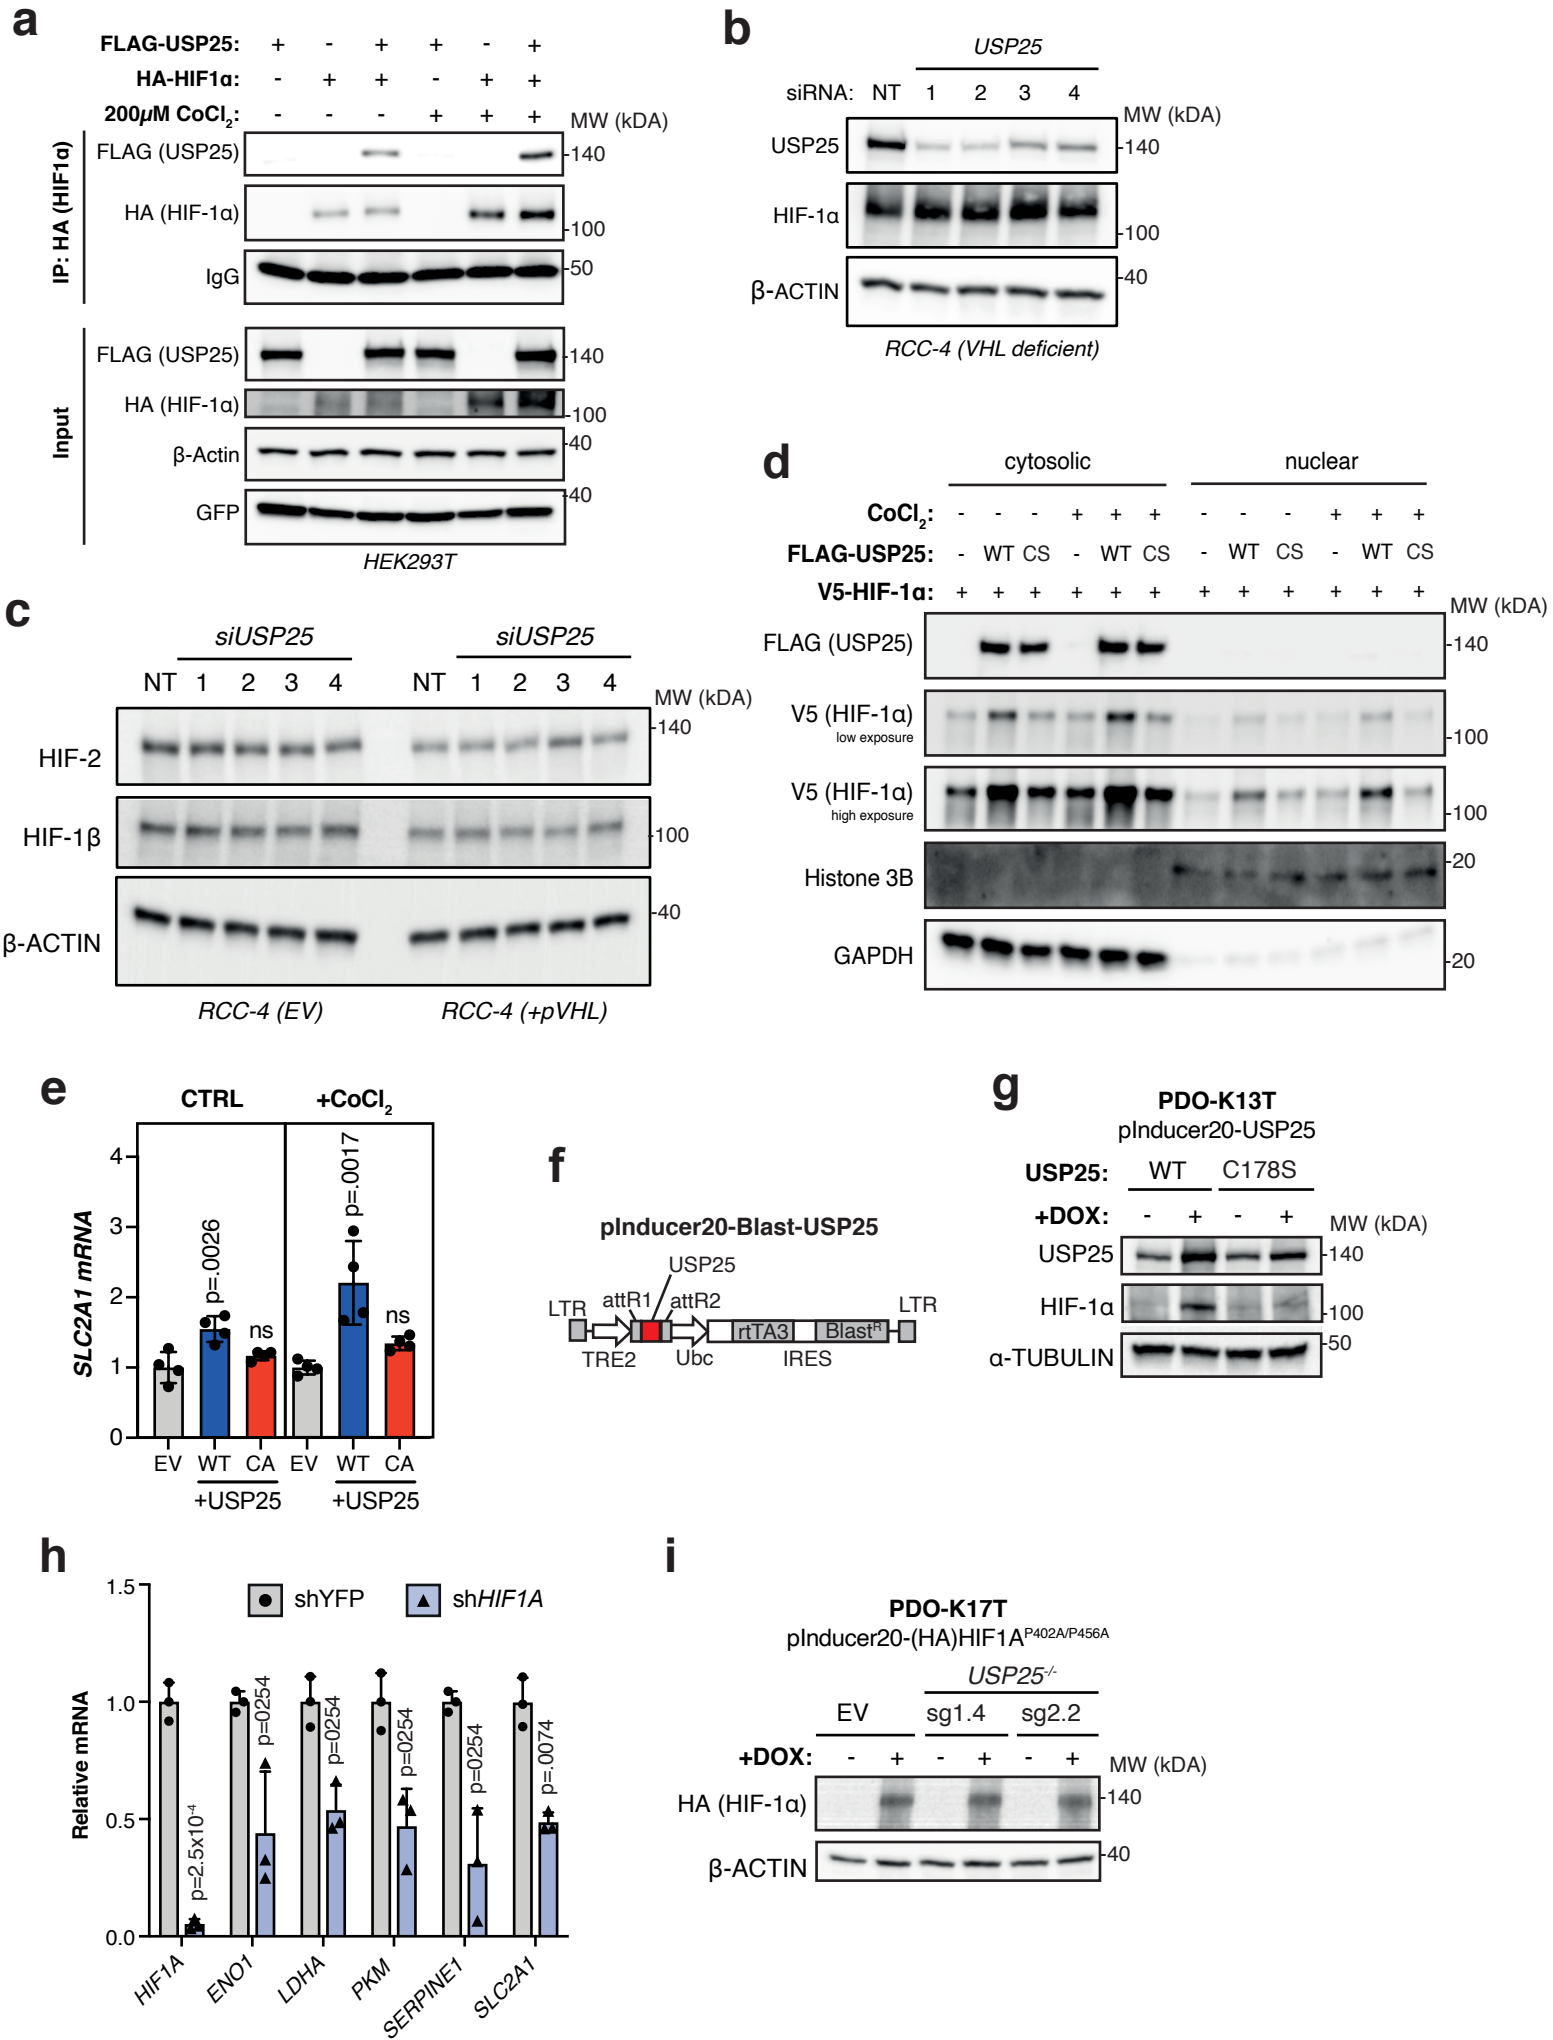

# Supplementary Figure 9

**a**

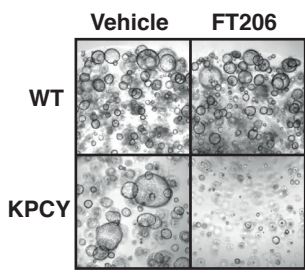

**b**

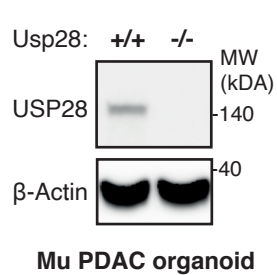

**c**

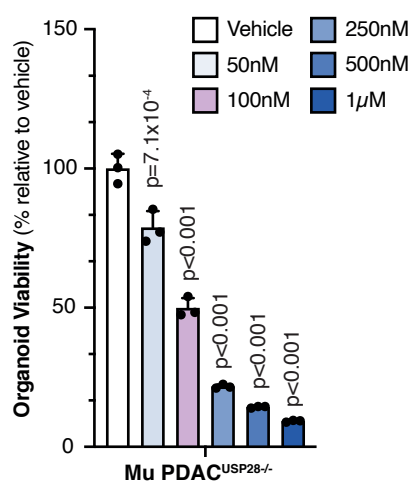

**d**

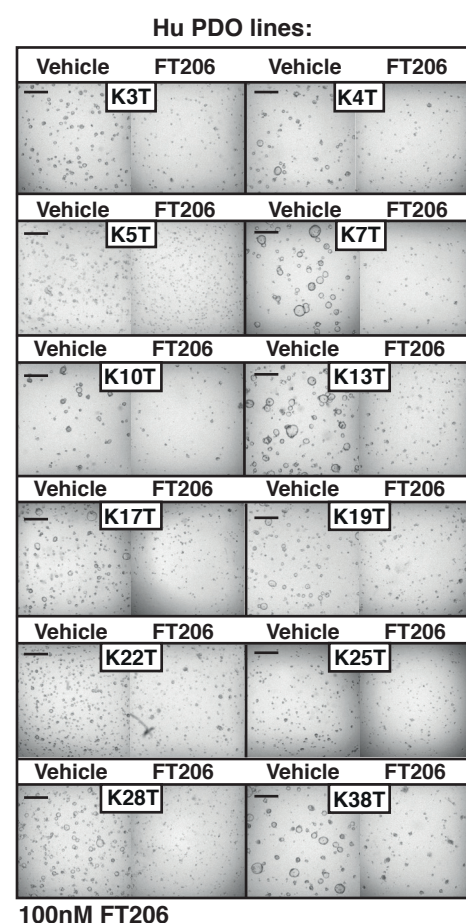

**e**

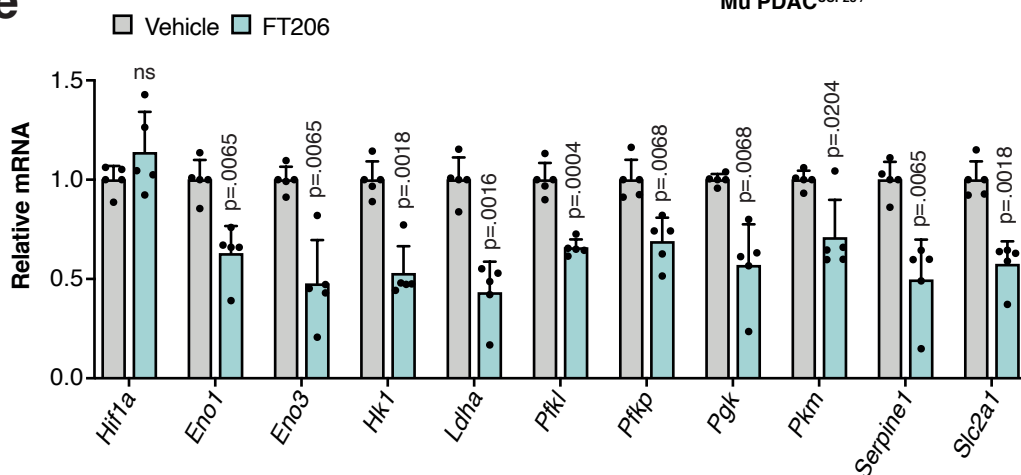

**f**

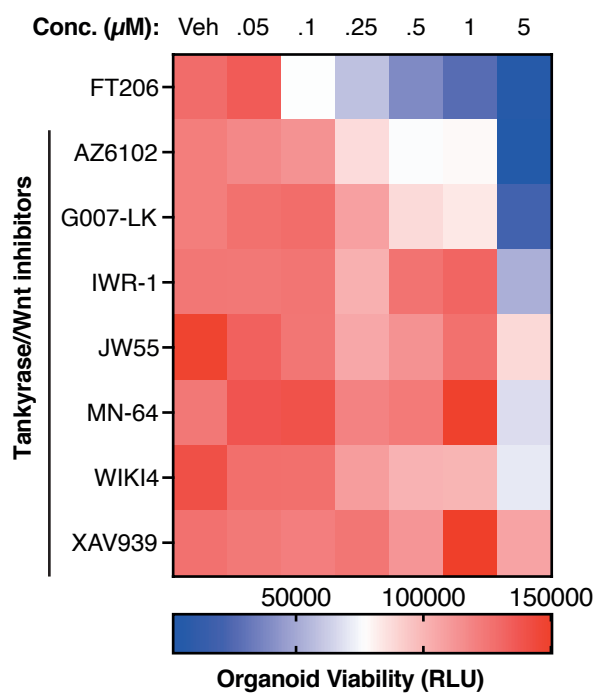

**g**

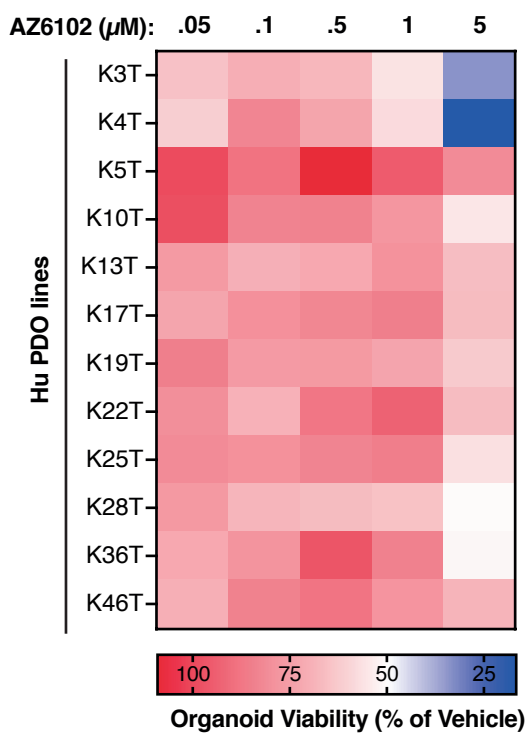

# Supplementary Figure 10

**a**

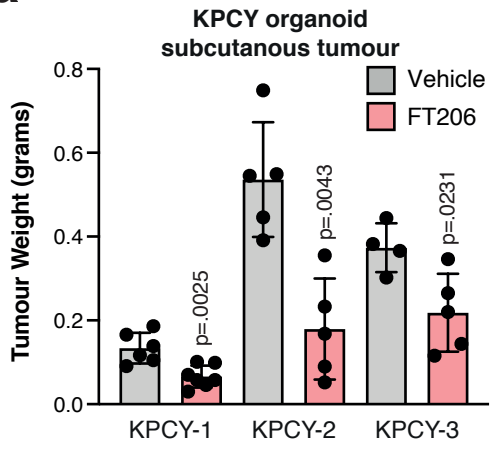

**b**

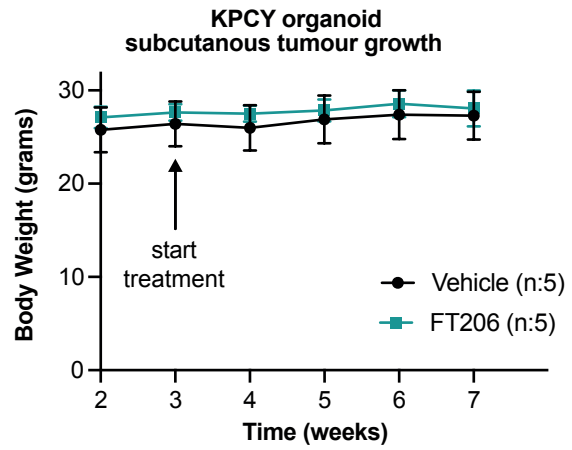

**c**

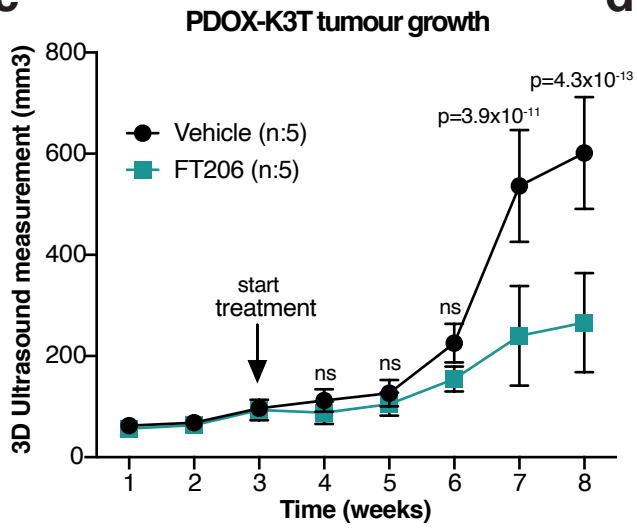

**d**

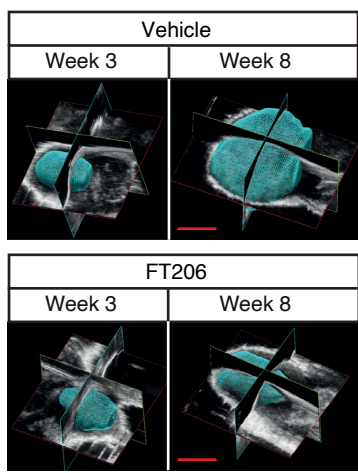

**e**

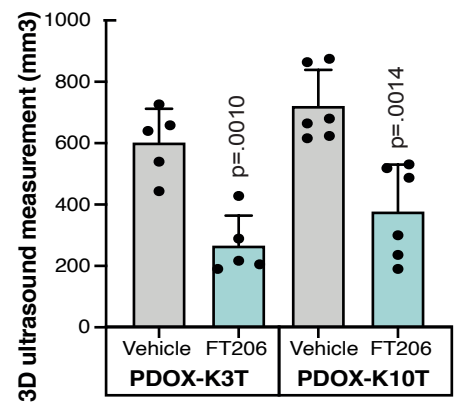

**f**

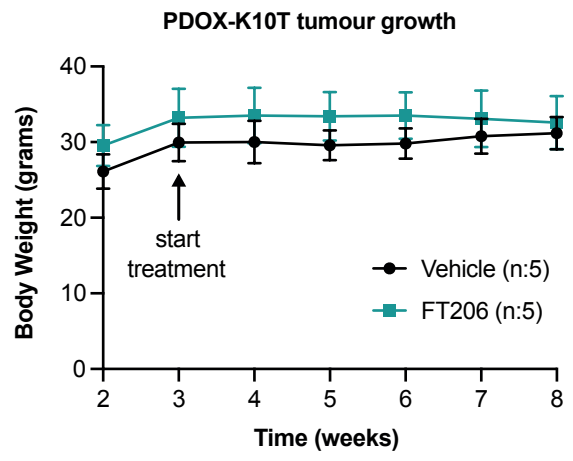

**g**

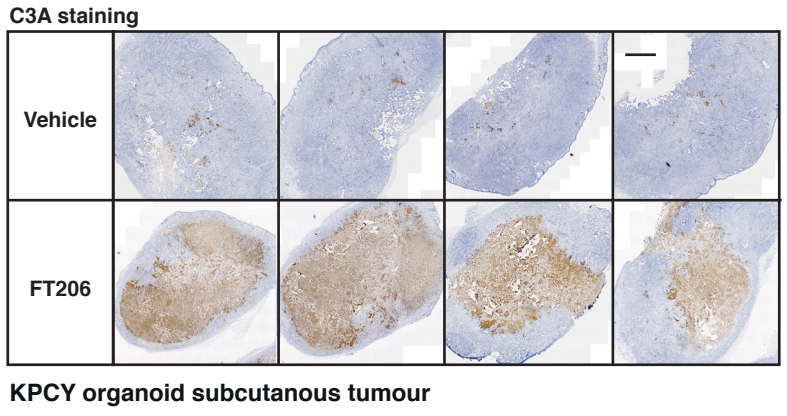

# Supplementary Figure 11

**a**

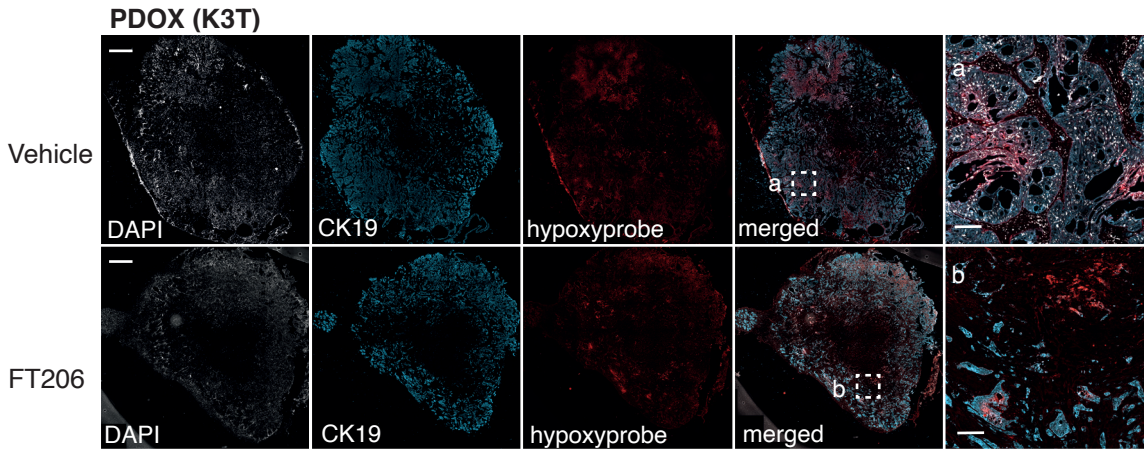

**b**

**c**

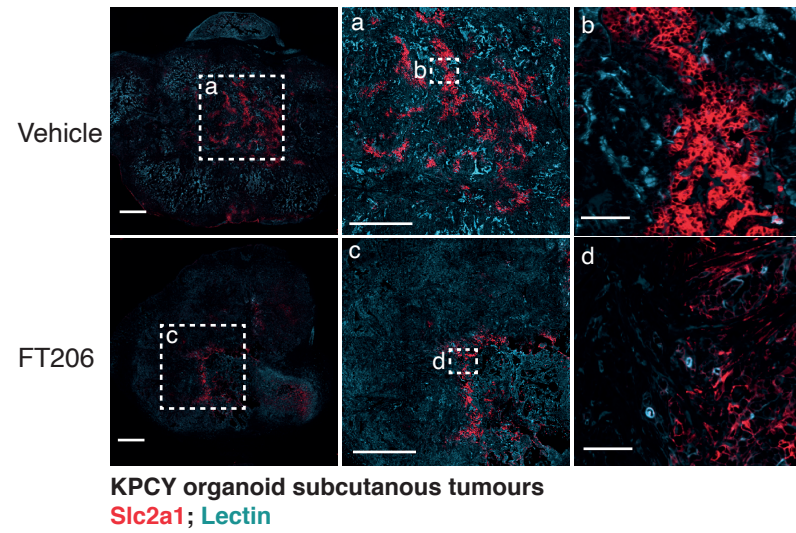

**d**

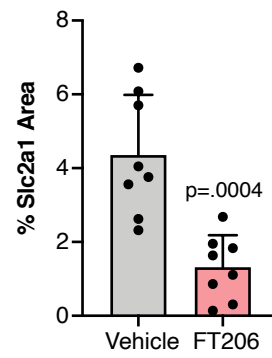

**e**

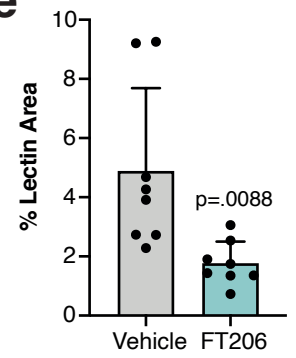

**f**

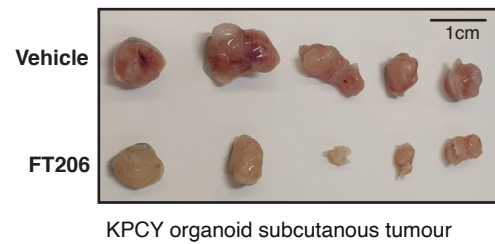

**g**

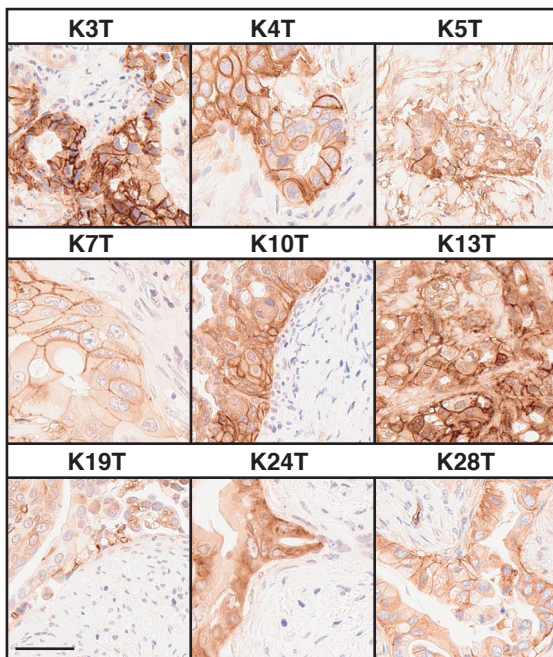

**Hu PDAC tissue**  
**SLC2A1 staining**

**h**

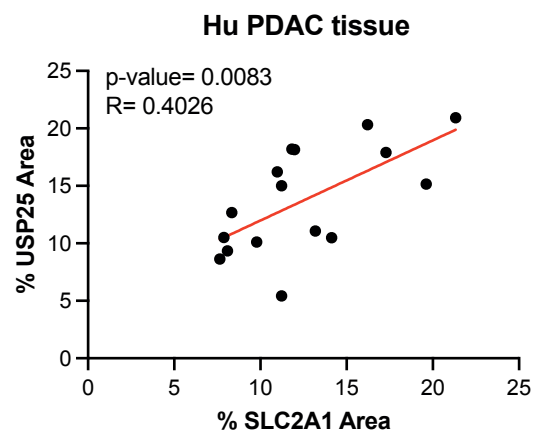

# Supplementary Figure 12

## PDAC

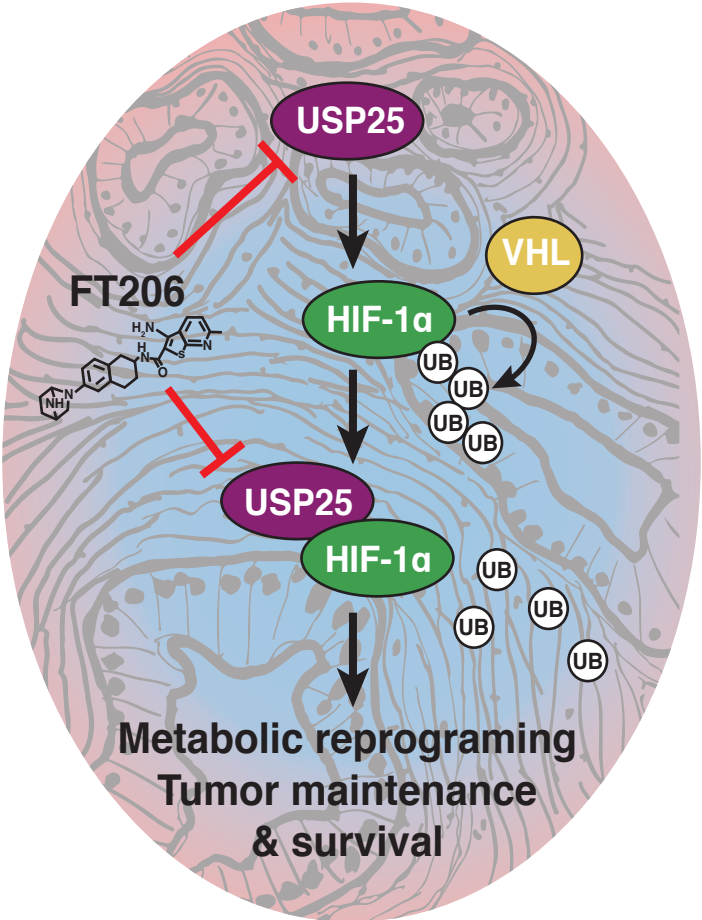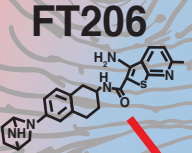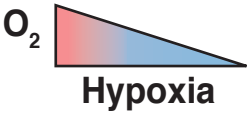

Supplement: 41467_2022_29684_MOESM1_ESM.pdf [file 41467_2022_29684_MOESM1_ESM.pdf]
